# Supplementary material
Source: PubMed Central journal article supplement (PMC3516186)
Supplement: NIHMS400958-supplement-8.pdf [file NIHMS400958-supplement-8.pdf]

**Supplementary Information for:****Integrative epigenomic analysis identifies biomarkers and therapeutic targets in adult B-acute lymphoblastic leukemia**

Huimin Geng<sup>1,2,7</sup>, Sarah Brennan<sup>1</sup>, Thomas A. Milne<sup>4,9</sup>, Wei-Yi Chen<sup>5</sup>, Yushan Li<sup>1</sup>, Christian Hurtz<sup>6,7,15</sup>, Soo-Mi Kweon<sup>6</sup>, Lynette Zickl<sup>8</sup>, Seyedmehdi Shojaee<sup>6,7</sup>, Chuanxin Huang<sup>1</sup>, Donna Neuberg<sup>8</sup>, Debabrata Biswas<sup>5</sup>, Yuan Xin<sup>1</sup>, Janis Racevskis<sup>3</sup>, Rhett P. Ketterling<sup>10</sup>, Selina M. Luger<sup>11</sup>, Hillard Lazarus<sup>14</sup>, Martin S. Tallman<sup>12</sup>, Jacob M. Rowe<sup>13</sup>, Mark R. Litzow<sup>10</sup>, Monica L. Guzman<sup>1</sup>, C. David Allis<sup>4</sup>, Robert G. Roeder<sup>5</sup>, Markus Müschen<sup>6,7</sup>, Elisabeth Paietta<sup>3,\*</sup>, Olivier Elemento<sup>2,\*</sup> and Ari Melnick<sup>1,\*</sup>

<sup>1</sup>Department of Medicine/Hematology-Oncology Division, <sup>2</sup>Institute for Computational Biomedicine, Weill Medical College of Cornell University, New York, New York

<sup>3</sup>Montefiore Medical Center, Albert Einstein College of Medicine, Bronx, New York

<sup>4</sup>Laboratory of Chromatin Biology and Epigenetics, <sup>5</sup>Laboratory of Biochemistry and Molecular Biology, the Rockefeller University, New York, New York

<sup>6</sup>Children's Hospital Los Angeles, University of Southern California, Los Angeles, California

<sup>7</sup>Department of Laboratory Medicine, University of California San Francisco, San Francisco, California

<sup>8</sup>Dana Farber Cancer Institute, Boston, Massachusetts

<sup>9</sup>MRC Molecular Haematology Unit, Weatherall Institute of Molecular Medicine, University of Oxford, Headington, Oxford, United Kingdom

<sup>10</sup>Department of Laboratory Medicine and Pathology, Mayo Clinic, Rochester, Minnesota

<sup>11</sup>Abramson Cancer Center, University of Pennsylvania, Philadelphia, Pennsylvania

<sup>12</sup>Department of Medicine, Memorial Sloan Kettering Cancer Center, New York, New York

<sup>13</sup>Department of Hematology and BMT, Rambam Medical Center, Haifa, Israel

<sup>14</sup>Department of Medicine, Case Western Reserve University, Cleveland, Ohio

<sup>15</sup>Max-Planck Institute for Immunobiology, Freiburg, Germany

**Running Title:** Integrative epigenomics of adult B-ALL

**\*To whom Correspondence should be addressed:**

Ari Melnick, MD

Division of Hematology/Oncology, Department of Medicine

Weill Cornell Medical College

1300 York Ave, New York, NY 10065

email: amm2014@med.cornell.edu

Olivier Elemento, PhD

Institute for Computational Biomedicine

Weill Cornell Medical College

1305 York Ave, New York, NY 10065

email: ole2001@med.cornell.edu

Elisabeth Paietta, PhD

Montefiore Medical Center-North Division

Albert Einstein College of Medicine

600 East 233rd Street, Bronx, NY 10466

e-mail: epaietta@earthlink.net

**SUPPLEMENTARY TABLES**

**Table S1:** Patient characteristics at diagnosis

**Table S2:** Characteristics of the 215 E2993 B-ALL patients and the 12 normal bone marrow samples (**excel file**).

**Table S3:** MassArray primers used for technical validation of HELP assays.

**Table S4:** Genes included in *BCR-ABL1*, *E2A-PBX1* or MLLr DNA methylation signatures vs. normal pre-B cells (**excel file**).

**Table S5:** Lymphoid gene sets and gene ontology terms enriched in B-ALL DNA methylation signatures vs. normal pre-B cells.

**Table S6:** Detailed genes in the lymphoid gene sets and gene ontology terms (**excel file**).

**Table S7:** DNA methylation and gene expression signature of *BCR-ABL1*-positive B-ALL (**excel file**).

**Table S8:** MassArray primers for DNA methylation signature genes in *BCR-ABL1* and MLLr B-ALL.

**Table S9:** QPCR primers for gene expression signature genes in *BCR-ABL1* and MLLr B-ALL and in E2A-PBX1 and MLL-AF4 knockdown experiments.

**Table S10:** DNA methylation and gene expression signature of *E2A-PBX1*-positive B-ALL (**excel file**).

**Table S11:** Antibodies used for QChIP and ChIP-seq.

**Table S12:** Primers used for QChIP.

**Table S13:** DNA methylation and gene expression signature of MLLr ALL (**excel file**).

**Table S14:** Summary of number of reads and peaks detected in ChIP-seq experiments.

**Table S15:** Genomic regions enriched in MLL<sup>N</sup>, AF4<sup>C</sup>, H3K79me2 and the common of the three ChIP-seq in RS4;11 cells (**excel file**).

**SUPPLEMENTARY FIGURES**

**Figure S1:** Technical validation of HELP arrays by MassArray EpiTyper

**Figure S2:** QPCR and MassArray EpiTyper validation of core signature genes in *BCR-ABL1*-positive B-ALL

**Figure S3:** *IL2RA*(CD25) expression is associated with *BCR-ABL1*-positive B-ALL

**Figure S4:** *IL2RA*(CD25) is the top differentially expressed and methylated genes between CD25-positive and CD25-negative, *BCR-ABL1*-positive B-ALL

**Figure S5:** Whole-genome-wide binding patterns of E2A, PBX1 and p300.

**Figure S6:** QPCR and MassArray EpiTyper validation of core signature genes in MLLr ALL

**Figure S7:** Primer locations for MLL<sup>N</sup>, AF4<sup>C</sup>, H3K79me2 and Histone 3 QChIP experiments in RS4;11 and CCRF-CEM cells

**Figure S8:** QChIP validation for the MLL/AF4 fusion binding in SEM cells

**Figure S9:** MLL-fusion target genes are more hypomethylated and expressed than non-target genes in MLLr B-ALL

**Figure S10:** *BCL6* mRNA expression in MLLr B-ALL cell lines and primary samples

**Figure S11:** Colony formation assay in two non-MLLr B-ALL cell lines, REH and Nalm6

**Figure S12:** *BCL6* mRNA expression in MLLr B-ALL primary samples

**Figure S13:** Effect of RI-BPI on viability of MLLr and non-MLLr B-ALL specimens

**Figure S14:** Scenario - DNA hypomethylation signatures in MLL/AF4 ALL are linked with MLL fusion oncoprotein binding and H3K79me2, which induce overexpression of these genes.

**SUPPLEMENTARY METHODS****Patient treatment**

Patients received 2 phases of standard induction therapy and, if in remission, were assigned to myeloablative allogeneic stem cell transplantation (alloHSCT) if they had a compatible donor, matched sibling or unrelated donor, and/or were BCR-ABL1 positive. Most of BCR-ABL1-positive patients without a suitable donor were treated with chemotherapy alone rather than being subjected to randomization. Other patients were randomized to chemotherapy for 2.5 years versus an autologous transplant. For the most recent patients accrued to the trial, a protocol modification introduced imatinib (600mg daily) into intensification after the second block of induction. From late 2005, a final cohort within the trial was given imatinib earlier, in conjunction with the 2nd phase of induction. Both cohorts resumed the drug for a further 2 years following alloHSCT, if tolerated. If alloHSCT was not possible, imatinib was permitted for 2 years, with maintenance. Among our study population, 26 patients received imatinib as part of their treatment regimen. The subset of imatinib treated patients were excluded in our survival analyses. Full details of the protocol were described previously (1).

**Total RNA extraction**

Total RNA was extracted from  $10^7$  cells using the RNeasy mini kit from Qiagen (Valencia, CA), and eluted in RNase-free water.

**Genomic DNA extraction**

High molecular weight DNA was extracted from  $5-10 \times 10^6$  cells using the Qiagen Puregene Gentra cell kit (Qiagen, Valencia, CA). DNA was diluted in 10mM Tris-HCl pH 8.0 and the quality was assessed in 1% agarose gel.

**Array-based methylation analysis using HELP**

One microgram of high molecular weight DNA was digested overnight with isoschizomer enzymes HpaII and MspI respectively (NEB, Ipswich, MA). DNA fragments were purified using phenol/chloroform, resuspended in 10mM Tris-HCl pH 8.0, and used immediately to set up the ligation reaction with MspI/HpaII-compatible adapters and T4 DNA ligase. Ligation-mediated PCR was

performed with enrichment for the 200 to 2000 base pair (bp) products and then submitted for labeling and hybridization onto a human HG\_17 promoter custom-designed oligonucleotide array covering 25,626 HpaII amplifiable fragments within the promoters of the genes.

### **Single locus quantitative DNA methylation assays**

MassArray EpiTyper assays (Sequenom, CA) were performed on bisulfite-converted DNA, as previously described(2). For HELP array technical validations, MassArray primers were designed to cover the flanking HpaII sites of selected HpaII Amplifiable Fragments (HAF), as well as any other HpaII sites found up to 2,000 bp upstream of the downstream site and up to 2,000 bp downstream of the upstream site, in order to cover all possible alternative sites of digestion. For the biological validation of the signature genes, MassArray primers were designed to cover CpG dense areas of interest associated with the respective HAFs. The primers were designed using Sequenom EpiDesigner beta software (Sequenom, Inc) and data were analyzed using EpiTYPER software version 1.0 (Sequenom, Inc). Note that MassArray and QPCR validation studies were performed in different sets of randomly selected specimens with available DNA and RNA, from among the cohort of 215 profiled E2993 patients.

### **Gene expression array data analysis**

Gene expression microarrays were performed using NimbleGen HG18 60mer expression 385K platform. Among the 215 B-ALL patient samples, 191 had enough cDNA for gene expression profiling. mRNA isolation, labeling, hybridization, and quality control was performed strictly according to the manufacturers protocol (Roche NimbleGen, Madison, WI). Raw pair files from the scanner were processed with the RMA algorithm in NimbleScan 2.5 software (Roche NimbleGen). Differentially expressed probesets between two groups were determined by Student's t-test and multiple testing correction with the BH method.

### **Quantitative real time PCR (QPCR)**

After total RNA extraction, cDNA synthesis was done using the Superscript III First Strand Kit from Invitrogen (Carlsbad, CA). QPCR reactions were performed using TaqMan™ or SyberGreen™ on a 7900 ABI RT-PCR machine (Applied Biosystems, CA).

#### **MLL-AF4 and E2A-PBX1 knockdown**

Briefly, the MLL-AF4 siRNAs used in this study were siMARS (sense, 5'-ACUUUAAGCAGACCUACUCCA-3'; antisense, 5'-UGGAGUAGGUCUGCUUAAAGUCC-3'), targeting the MLL-AF4 fusion site specific in RS4;11 cells, and siMA6 (sense, 5'-AAGAAAAGCAGACCUACUCCA-3'; antisense, 5'-UGGAGUAGGUCUGCUUUUCUUUU-3'), targeting the MLL-AF4 fusion site specific in SEM cells. The mismatch control was siMM (sense, 5'-AAAAGCUGACCUUCUCCAAUG-3'; antisense, 5'-CAUUGGAGAAGGUCAGCUUUUCU-3').

#### **Genomic DNA-fragment library**

Genomic DNA-fragment libraries were prepared using the Illumina ChIP-seq Library preparation Kit following the manufacturer's instructions (Illumina, CA). Briefly 10ng of purified ChIP DNA was end repaired by conversion of overhangs into phosphorylated blunt ends with the use of T4 DNA polymerase and E. coli DNA polymerase I Klenow fragment. Illumina single-end adapters were ligated to the ends of the DNA fragments. Ligation products were purified on a 2% agarose gel with a size selection of 200-300bp. Fifteen PCR cycles were performed with Illumina genomic DNA primers that anneal to the ends of the adapters. The purified PCR-amplified fragment libraries were quantified with the use of the PicoGreen dsDNA Quantitation Assay with the Qubit Fluorometer (Invitrogen, CA). The size range of libraries was validated on the Agilent Technologies 2100 Bioanalyzer with the High Sensitivity DNA Kit (Agilent, CA).

#### **ChIP sequencing (ChIPseq)**

After library preparation, the protocols for the Illumina Single-Read Cluster Generation Kit were used for cluster generation on the cBOT (Illumina). The targeted samples were diluted to 10 nmol and denatured with sodium hydroxide. Seven pico moles of each target-enriched sample and Phix control were loaded into separate lanes of the same flow cell, hybridized, and isothermally amplified. After

linearization, blocking, and primer hybridization, sequencing was performed for 36 cycles on an Illumina GAIIx or HiSeq2000. Raw image data were converted into base calls via the Illumina pipeline CASAVA version 1.7 with default parameters. Rigorous quality control was performed with the use of data from reports generated by the Illumina pipeline. All 36-bp-long reads were mapped to the reference human genome sequence, hg18, using Illumina's ELAND aligner with the default parameters. Only reads mapping uniquely to the genome with not more than 2 mismatches were retained for further analysis. Clonal reads (i.e., reads mapping at the same genomic position and on the same strand) were collapsed into a single read. Peaks from ChIP-seq data were called using the ChIPseeqer program (3) with parameters indicated in **Table S14** and annotated to genes (-2kb to TSS and +1kb to TES) and/or promoters (+/- 2kb to TSS) based on hg18 refseq genes downloaded from the UCSC Genome Browser.

### **Pathway analysis**

The gene sets for canonical pathways and Gene Ontology (GO) terms were downloaded from the Molecular Signatures Database (MSigDB) at <http://www.broad.mit.edu/gsea/msigdb/> using C5 collection. The B-cell and lymphoid specific signatures were curated by Staudt laboratory and downloaded from <http://lymphochip.nih.gov/signaturedb/>. This database contains ~250 gene sets/signatures associated with normal lymphoid biology and lymphoid neoplasms(4). Fisher's Exact test was used to calculate enrichment p values for each of those gene sets and the BH method(5) was used for False Discovery Rate (FDR) control. The Ingenuity Pathway Analysis (IPA) software (Ingenuity Systems, Inc. Redwood City, CA) was also used to identify deregulated gene networks.

**SUPPLEMENTARY TABLES****Table S1:** Patient characteristics at diagnosis

| <b>Characteristic</b>                     | <b>Value</b>             |
|-------------------------------------------|--------------------------|
| <b>Male/Female</b>                        | 120/95 (55.6%,<br>44.4%) |
| <b>Age, year (1 unknown)</b>              |                          |
| <20                                       | 10 (4.7%)                |
| 20-29                                     | 44 (20.6%)               |
| 30-39                                     | 54 (25.2%)               |
| 40-49                                     | 51 (23.8%)               |
| 50-59                                     | 46 (21.5%)               |
| >=60                                      | 9 (4.2%)                 |
| Median (range)                            | 39 (17-63)               |
| <b>WBC X 10<sup>9</sup>/L (8 unknown)</b> |                          |
| <30                                       | 102 (49.3%)              |
| >=30                                      | 105 (50.7%)              |
| Median (range)                            | 30.7 (0.8-438)           |
| <b>Immunophenotype</b>                    |                          |
| Pro-B-ALL                                 | 34 (15.8%)               |
| Pre-B-ALL                                 | 25 (11.6%)               |
| Early-Pre-B-ALL                           | 146 (67.9%)              |
| Transitional-Pre-B-ALL                    | 5 (2.3%)                 |
| Mature-B-ALL                              | 5 (2.3%)                 |
| <b>Cytogenetics</b>                       |                          |
| BCR-ABL1                                  | 83 (38.6%)               |
| E2A-PBX1                                  | 7 (3.3%)                 |
| MLLr                                      | 28 (13.0%)               |
| Negative of the above                     | 97 (45.1%)               |
| <b>BCR-ABL1 breakpoint<br/>(n=83)</b>     |                          |
| e1a2                                      | 58 (69.9%)               |
| b2a2/b3a2                                 | 25 (30.1%)               |

**Table S2:** Characteristics of the 215 E2993 B-ALL patients (A) and the 12 normal bone marrow samples (B) (**excel file**).



**Table S3:** MassArray primers used for technical validation of HELP assays. Forward primers were indicated by “\_F” and reverse primers by “\_R”.

| Target Promoter | sequence (5' → 3')                                            |
|-----------------|---------------------------------------------------------------|
| B2M_MA1_F       | aggaagagagGTGGGGTTAGTTTAGGGTTGGATT                            |
| B2M_MA1_R       | cagtaatacgactcactatagggagaaggctACCCACATAAACCCAAAAATACTAAAA    |
| B2M_MA2_F       | aggaagagag TTTTGTGGTTGTTTTAAGATGTATTGT                        |
| B2M_MA2_R       | cagtaatacgactcactatagggagaaggctAAAACCTAAACTCAAAAAATCCTCCC     |
| B2M_MA3_F       | aggaagagagTTAGTATTTTTGGGGTTAGTTTGTAAG                         |
| B2M_MA3_R       | cagtaatacgactcactatagggagaaggctACCACCAAAAAAACTTAAAAAAA        |
| CARD6-MA1_F     | aggaagagagGGAGGTGATTTTGGGTTTGGATTAT                           |
| CARD6-MA1_R     | cagtaatacgactcactatagggagaaggctTTTTCTCAAAAAATCTATAACATTCTCCA  |
| CARD6-MA2_F     | aggaagagagGTTTTTTAGTGAAATAAGAGGTGGTTGG                        |
| CARD6-MA2_R     | cagtaatacgactcactatagggagaaggctAAAACCTCAAAACTTCATCCCTCTC      |
| CEP70-MA1_F     | aggaagagagGGGTTAGTTAGTTGGGATTAGTTA                            |
| CEP70-MA1_R     | cagtaatacgactcactatagggagaaggctTCAACAAATATTTATTTAAATCCTCCAAAT |
| CEP70-MA2_F     | aggaagagagTATTGGTTTTAAGAGTTTTTTATGGGTTTT                      |
| CEP70-MA2_R     | cagtaatacgactcactatagggagaaggctCTAACTCAACATCTAATTCAATCCCTAAT  |
| CFHL5_MA1_F     | aggaagagagTTTTTTGGTTGGGAGTGAATATATTAAGAT                      |
| CFHL5_MA1_R     | cagtaatacgactcactatagggagaaggctCCTATAATCCCAACACTTTAAAAAAC     |
| CFHL5_MA2_F     | aggaagagagTTGGGATTATAGGTTTGGATTATTG                           |
| CFHL5_MA2_R     | cagtaatacgactcactatagggagaaggctAACAATCAAAAAATAACTATTTAAAAAAA  |
| CFHL5_MA3_F     | aggaagagagTTTTTGAATAGTTGAATTTTTGGTTAGAA                       |
| CFHL5_MA3_R     | cagtaatacgactcactatagggagaaggctTCCCCAACAATAAATACCCATAAA       |
| CSF2_MA1_F      | aggaagagagTAGATTGTTTAGGGAGGGTTGGAGAG                          |
| CSF2_MA1_R      | cagtaatacgactcactatagggagaaggctCAAACCACAATACCCAAAAACAACA      |
| CSF2_MA2_F      | aggaagagagGGGTTGGGGGTAGTAGTAAAAAGGA                           |
| CSF2_MA2_R      | cagtaatacgactcactatagggagaaggctACCCCTAAAATCCTAAACAACCAC       |
| CSF2_MA3_F      | aggaagagagGGTTTTGATTTTGGTTGTTATTGGTAG                         |
| CSF2_MA3_R      | cagtaatacgactcactatagggagaaggctACTATAACCCACCCCTTAATCCCTC      |
| CSF2_MA4_F      | aggaagagagTGTTGTTTTTGGTATTGTGGTTTTG                           |
| CSF2_MA4_R      | cagtaatacgactcactatagggagaaggctCAATTACTACCCCTCCTCTACAAC       |
| HEL308-MA1_F    | aggaagagagGTTATAATGGAGTATAGGATATGGAGATTT                      |
| HEL308-MA1_R    | cagtaatacgactcactatagggagaaggctCTTCTACATCCACCTTAAAAAAA        |
| HEL308-MA2_F    | aggaagagagTTTTGAGAGTTAATTTGGGGTTTTTTTT                        |
| HEL308-MA2_R    | cagtaatacgactcactatagggagaaggctAATCTCCCACCCCTCTATCAATAAAC     |
| HEL308-MA3_F    | aggaagagagGGAGGTAGAGATGGGAGGATTATTTAAGT                       |
| HEL308-MA3_R    | cagtaatacgactcactatagggagaaggctCACCCAACTAAAACACAATAACTCCA     |
| IL10-MA1_F      | aggaagagagTTTTTAGATATTTGAAGAAGTTTTGATGTT                      |
| IL10-MA1_R      | cagtaatacgactcactatagggagaaggctAAATAATACTACCATAACCCCTACC      |
| IL10-MA2_F      | aggaagagagTTTGGGTATTTATTTTAGGTTGGGG                           |
| IL10-MA2_R      | cagtaatacgactcactatagggagaaggctAACTCAAAAAACCTCTTCATTCATTAAAA  |
| IL3-MA1_F       | aggaagagagTGAGTATGTAAGGAATAAATTTGGGTT                         |
| IL3-MA1_R       | cagtaatacgactcactatagggagaaggctAAACACAACCTCAACACACAAAAAAA     |
| IL3-MA2_F       | aggaagagagGTTTGGGGTTGAGTTAGGAGGGTATAT                         |
| IL3-MA2_R       | cagtaatacgactcactatagggagaaggctATCCCAAAAAACAACCCCTAAAAAA      |
| IL3-MA3_F       | aggaagagagAAGATTGAGTTGTTAGTGGAGGTTATTATG                      |
| IL3-MA3_R       | cagtaatacgactcactatagggagaaggctCTCAACCCCAAACTAAACCCCTAAAC     |

---

|               |                                                              |
|---------------|--------------------------------------------------------------|
| IL3-MA4_F     | aggaagagagGTTTGTGGTTTTTTATGGAGGTTTTATGT                      |
| IL3-MA4_R     | cagtaatcgactcactatagggagaaggctACAACCACCACCCTCACTACTAC        |
| IL3-MA5_F     | aggaagagagTTAGAGGGATTGTTAGGGTTGTAGT                          |
| IL3-MA5_R     | cagtaatcgactcactatagggagaaggctACCAATAAAATCTCATCTACCATCAC     |
| P53AIP1_MA1_F | aggaagagagGGGATGTTGAGGTGGGTAGATTATTT                         |
| P53AIP1_MA1_R | cagtaatcgactcactatagggagaaggctAAACTTCCAACCTTCCCCTAACAAAT     |
| P53AIP1_MA2_F | aggaagagagGTGATTGTTTTTTGGTTGTTGGAG                           |
| P53AIP1_MA2_R | cagtaatcgactcactatagggagaaggctCAAATTCCTCAAAACTACTTCTATTTTTAA |
| P53AIP1_MA3_F | aggaagagagTGTTTCAAAGTTGGTAATATGTAAAAAGGT                     |
| P53AIP1_MA3_R | cagtaatcgactcactatagggagaaggctAAACAAAACCCCTAAAATCCTAAC       |
| P53AIP1_MA4_F | aggaagagagAGGTGAGAAAGATTAATAATTAGTTTTGTGT                    |
| P53AIP1_MA4_R | cagtaatcgactcactatagggagaaggctTCTCCTCACCTACCTCCTAAAATC       |
| P53AIP1_MA5_F | aggaagagagGATTGTGGTTGGTAAGTAGGGGAAG                          |
| P53AIP1_MA5_R | cagtaatcgactcactatagggagaaggctCCCCTAAACCCTATACCCATTTCTC      |
| RIT1_MA1_F    | aggaagagagGGTTAGGAGTTTGAGATTAGTTTGGTTAAT                     |
| RIT1_MA1_R    | cagtaatcgactcactatagggagaaggctCTACTAACTCTTACAACCCAAACATACCA  |
| RIT1_MA2_F    | aggaagagagTTGTTTTTATTGGTTAGTGGGGATTG                         |
| RIT1_MA2_R    | cagtaatcgactcactatagggagaaggctAAAATACCCCTATCCTCCCTTCTC       |
| RIT1_MA3_F    | aggaagagagAGAGGAAGGGAGGATAGGGGTATTT                          |
| RIT1_MA3_R    | cagtaatcgactcactatagggagaaggctACCCAAAAAACATTTAAAAAAAACAATAA  |
| RIT1_MA4_F    | aggaagagagTTGTTTTTTTTAATGTTTTTTTTGGGT                        |
| RIT1_MA4_R    | cagtaatcgactcactatagggagaaggctAATAATTCTCCTACCTCAACCTCCC      |
| S100A9_MA1_F  | aggaagagagTTATTTTATTGGTTTTTTAGGGGTGA                         |
| S100A9_MA1_R  | cagtaatcgactcactatagggagaaggctAAACCCTCTTAAAATAACCCTACCTA     |
| S100A9_MA2_F  | aggaagagagAGGAATTAGAATAGTTGGGTTTTTTTT                        |
| S100A9_MA2_R  | cagtaatcgactcactatagggagaaggctAAACACTTAACCCTTTAACCTATC       |
| S100A9_MA3_F  | aggaagagagGGGGTTTTTTTTAATTTTAAGGGTTT                         |
| S100A9_MA3_R  | cagtaatcgactcactatagggagaaggctCCACCCAACATCCTACCTACCTAAA      |
| ST18-MA1_F    | aggaagagagGTTTGTATGTTTGTAGTGGGGAGGG                          |
| ST18-MA1_R    | cagtaatcgactcactatagggagaaggctAAAAAAAACAAAAATTCCCAAAACCA     |
| ST18-MA2_F    | aggaagagagAGGGGAGAGGGTTGTTTTTTGATAG                          |
| ST18-MA2_R    | cagtaatcgactcactatagggagaaggctCCTCTAATATTCCCCTAAAATCACATTCA  |
| ST18-MA3_F    | aggaagagagGTATTGGGTTGAATTTTGTAGAGAAAATATA                    |
| ST18-MA3_R    | cagtaatcgactcactatagggagaaggctCCTAAATAAAAAATAAATCAATCCCC     |
| TNFRSF9_MA1_F | aggaagagagTATAATTGAGGTAGGAGAATGGGGAATAT                      |
| TNFRSF9_MA1_R | cagtaatcgactcactatagggagaaggctTATAATTGAGGTAGGAGAATGGGGAATAT  |
| TNFRSF9_MA2_F | aggaagagagTTGTTGTGTTTTTTTTGTTTTTATTTTTT                      |
| TNFRSF9_MA2_R | cagtaatcgactcactatagggagaaggctATCCCCTAACTCCATAATCACTATAATACA |
| TNFRSF9_MA3_F | aggaagagagTAGGGTTGTTATAGAGTTGTGGTGGG                         |
| TNFRSF9_MA3_R | cagtaatcgactcactatagggagaaggctAAAAACAAAAATTCCAATCTCACCC      |
| TNFRSF9_MA4_F | aggaagagagATTTTTGTATTTTGGTAGAATATGATGGAA                     |
| TNFRSF9_MA4_R | cagtaatcgactcactatagggagaaggctTAAATTTTCATTTTCCTTCTTAAAAAAA   |
| TREML2_MA1_F  | aggaagagagTGGGTTTTTATATATTGAAGGAGTAGATGA                     |
| TREML2_MA1_R  | cagtaatcgactcactatagggagaaggctACATACACATACACTCACACTCACAATCTC |
| TREML2_MA2_F  | aggaagagagGGGGTTTTTAGATTGGGTGGAGTAGT                         |
| TREML2_MA2_R  | cagtaatcgactcactatagggagaaggctCCACAACAACAACAACAACAAAAAAA     |
| TREML2_MA3_F  | aggaagagagTTAGGAGTTTGGGAGAGAGAGAGAGG                         |
| TREML2_MA3_R  | cagtaatcgactcactatagggagaaggctCAATATAAAACCCACTACCCCAAC       |
| TREML2_MA4_F  | aggaagagagATTATGAGGAAAGGGTTGTGTTT                            |

---

|              |                                                               |
|--------------|---------------------------------------------------------------|
| TREML2_MA4_R | cagtaatacgcactactatagggagaaggctAAATCTCCCCTTCAAAAAACCTCAC      |
| TSPAN-MA1_F  | aggaagagagGTTTTGATTTAGGATTTTAAAGAAA                           |
| TSPAN-MA1_R  | cagtaatacgcactactatagggagaaggctATTTTAAAACAAAATCTCCCTCTATC     |
| TSPAN-MA2_F  | aggaagagagTAAGTGAAAAGGTGGAGGTTTTTTTTATTT                      |
| TSPAN-MA2_R  | cagtaatacgcactactatagggagaaggctCCCCTTCCCCTATTCTACAATAAC       |
| TSPAN-MA3_F  | aggaagagagGGTTTTAGAGTTGGGGAGATGGTT                            |
| TSPAN-MA3_R  | cagtaatacgcactactatagggagaaggctAAAAATAAACCTCAAAATCATCCTATCA   |
| TTRAP-MA1_F  | aggaagagagGTTTAGAAGTTAGTGAAAGAAGGAGGATAT                      |
| TTRAP-MA1_R  | cagtaatacgcactactatagggagaaggctAAACAACTCCACACACAAAAATC        |
| TTRAP-MA2_F  | aggaagagagGATTTTTGTGTGTGGAGTTTGTTT                            |
| TTRAP-MA2_R  | cagtaatacgcactactatagggagaaggctCCCTCATCACTTACTAAATCTTAAACTCAA |
| TTRAP-MA3_F  | aggaagagagTTAAGATTTAGTAAGTGATGAGGGGAG                         |
| TTRAP-MA3_R  | cagtaatacgcactactatagggagaaggctAACCAAATAATAAAAAACCTTATAAAACAA |
| TTRAP-MA4_F  | aggaagagagTTTTTTGTAATAGGTTTTTAGAAAAGATG                       |
| TTRAP-MA4_R  | cagtaatacgcactactatagggagaaggctTCACTCCAAAATTAATTCCTAC         |

**Table S4:** Genes included in *BCR-ABL1*, *E2A-PBX1* or MLLr DNA methylation signatures vs. normal pre-B cells (**excel file**)

**Table S5:** Lymphoid gene sets (A) and gene ontology terms (B) enriched in B-ALL DNA methylation signatures vs. normal pre-B cells, and detailed information of the enriched lymphoid gene sets (C). P values were calculated by Fisher's Exact test and multi-testing adjusted by Benjamini and Hochberg (BH) method. Pathways with BH<0.05 in at least one subtype were shown.

**(A)**

| Lymphoid gene sets                      | BH <i>BCR-ABL1</i> | BH <i>E2A-PBX1</i> | BH MLLr |
|-----------------------------------------|--------------------|--------------------|---------|
| Myc_ChIP_PET_2plus                      | 0.0005             | 8.2e-12            | 8.7e-08 |
| BCL6_target_ChIPseq                     | 0.002              | 0.09               | 0.049   |
| Dendritic_cell_CD123pos_blood           | 0.005              | 0.11               | 0.018   |
| HRAS_overexpression_2x_up               | 0.007              | 0.29               | 0.18    |
| p53_up_Xray                             | 0.012              | 0.50               | 0.77    |
| CD8_T_effectorDn_memoryIm_NaiveUp       | 0.013              | 0.09               | 1.00    |
| IL10_OCILy3_Up                          | 0.013              | 1.00               | 0.31    |
| Cell_cycle_Liu                          | 0.022              | 0.65               | 0.18    |
| Lymph_node_DLBCl                        | 0.030              | 0.35               | 0.51    |
| Blimp_proliferation_repressed           | 0.031              | 0.81               | 0.92    |
| Resting_monocyte_GNF                    | 0.042              | 1.00               | 0.09    |
| Notch_T-ALL_down_Palomero               | 0.043              | 0.42               | 1.00    |
| Tcell_cytokine_induced_IL2_IL7_IL15only | 0.049              | 0.42               | 0.31    |
| SREBP1a&2_up_Scap_dep                   | 0.53               | 0.016              | 0.39    |
| CNS_PNS_Node1663                        | 0.57               | 0.016              | 0.30    |
| Glutamine_Glucose_starve_both_down      | 0.26               | 0.021              | 0.08    |
| Tcell_cytokine_induced_IL4only          | 0.44               | 0.042              | 0.51    |

**(B)**

| <b>Gene Ontology (GO) terms</b>                      | <b>BH <i>BCR-ABL1</i></b> | <b>BH <i>E2A-PBX1</i></b> | <b>BH <i>MLLr</i></b> |
|------------------------------------------------------|---------------------------|---------------------------|-----------------------|
| Signal_Transduction                                  | 0.026                     | 0.044                     | 6E-06                 |
| Cell_Cell_Signaling                                  | 0.001                     | 0.018                     | 0.007                 |
| Negative_Regulation_of_Biological_Process            | 0.011                     | 0.019                     | 0.013                 |
| Cell_Proliferation                                   | 0.010                     | 0.031                     | 0.001                 |
| Negative_Regulation_of_Cellular_Process              | 0.014                     | 0.051                     | 0.013                 |
| Regulation_of_Cell_Proliferation                     | 0.010                     | 0.103                     | 0.001                 |
| Positive_Regulation_of_Biological_Process            | 0.033                     | 0.138                     | 0.0002                |
| Cell_Surface_Receptor_Linked_Signal_Transduction     | 0.027                     | 0.378                     | 0.007                 |
| Protein_Metabolic_Process                            | 0.035                     | 0.0003                    | 0.106                 |
| Cellular_Protein_Metabolic_Process                   | 0.050                     | 0.001                     | 0.126                 |
| Cellular_Macromolecule_Metabolic_Process             | 0.026                     | 0.001                     | 0.140                 |
| Transmission_of_Nerve_Impulse                        | 0.021                     | 0.033                     | 0.089                 |
| Response_to_Ionizing_Radiation                       | 0.024                     | 0.040                     | 0.192                 |
| Negative_Regulation_of_Cell_Proliferation            | 0.014                     | 0.063                     | 0.159                 |
| Regulation_of_Multicellular_Organismal_Process       | 0.012                     | 0.087                     | 0.185                 |
| Regulation_of_Developmental_Process                  | 0.042                     | 0.131                     | 0.114                 |
| Synaptic_Transmission                                | 0.013                     | 0.131                     | 0.123                 |
| Positive_Regulation_of_Response_To_Stimulus          | 0.050                     | 0.139                     | 0.534                 |
| Programmed_Cell_Death                                | 0.026                     | 0.219                     | 0.114                 |
| Apoptosis                                            | 0.041                     | 0.219                     | 0.114                 |
| Negative_Regulation_of_Cytokine_Biosynthetic_Process | 0.045                     | 0.318                     | 0.288                 |
| Regulation_of_Response_to_Stimulus                   | 0.050                     | 0.318                     | 0.828                 |
| Actin_Polymerization_and_or_Depolymerization         | 0.044                     | 0.710                     | 0.126                 |
| Cytoskeleton_Organization_and_Biogenesis             | 0.026                     | 0.819                     | 0.553                 |
| System_Process                                       | 0.257                     | 0.005                     | 0.013                 |
| Response_to_Extracellular_Stimulus                   | 0.104                     | 0.033                     | 0.013                 |
| Protein_Modification_Process                         | 0.385                     | 0.001                     | 0.420                 |
| Biopolymer_Modification                              | 0.480                     | 0.003                     | 0.492                 |
| Multicellular_Organismal_Development                 | 0.104                     | 0.003                     | 0.114                 |
| System_Development                                   | 0.252                     | 0.006                     | 0.289                 |
| Anatomical_Structure_Development                     | 0.543                     | 0.008                     | 0.126                 |
| Post_Translational_Protein_Modification              | 0.951                     | 0.019                     | 0.872                 |
| Biopolymer_Metabolic_Process                         | 0.151                     | 0.021                     | 0.160                 |
| Nucleotide_Biosynthetic_Process                      | 0.351                     | 0.023                     | 0.509                 |
| Regulation_of_Response_to_External_Stimulus          | 0.064                     | 0.031                     | 0.341                 |
| Purine_Nucleotide_Metabolic_Process                  | 0.227                     | 0.031                     | 0.341                 |
| Nervous_System_Development                           | 0.285                     | 0.033                     | 0.793                 |
| Biosynthetic_Process                                 | 0.104                     | 0.035                     | 0.114                 |
| Positive_Regulation_of_Protein_Modification_Process  | 0.835                     | 0.040                     | 0.145                 |
| Positive_Regulation_of_Phosphate_Metabolic_Process   | 0.851                     | 0.045                     | 0.151                 |
| Calcium_Ion_Transport                                | 1.000                     | 0.045                     | 0.312                 |
| Positive_Regulation_of_Cellular_Process              | 0.104                     | 0.251                     | 0.0003                |
| Cellular_Response_to_Extracellular_Stimulus          | 0.683                     | 0.318                     | 0.020                 |

|                                            |       |       |       |
|--------------------------------------------|-------|-------|-------|
| Intracellular_Signaling_Cascade            | 0.683 | 0.319 | 0.019 |
| Positive_Regulation_of_Cell_Proliferation  | 0.162 | 0.718 | 0.020 |
| Multi_Organism_Process                     | 0.277 | 0.904 | 0.047 |
| Positive_Regulation_of_Signal_Transduction | 1.000 | 0.925 | 0.047 |
| Receptor_Mediated_Endocytosis              | 0.935 | 1.000 | 0.040 |

## (C)

| Signature names                              | Signature identifiers (Shaffer et al, Immunol Rev. 2006) | Detailed explanation (Shaffer et al, Immunol Rev. 2006)                                                                                                                                             | Reference for the signatures                                                                                                                                                                                                            | Selection criteria (Shaffer et al, Immunol Rev. 2006)                                                                     |
|----------------------------------------------|----------------------------------------------------------|-----------------------------------------------------------------------------------------------------------------------------------------------------------------------------------------------------|-----------------------------------------------------------------------------------------------------------------------------------------------------------------------------------------------------------------------------------------|---------------------------------------------------------------------------------------------------------------------------|
| MYC target genes                             | MYC_ChIP_PET_2plus                                       | <a href="http://lymphochip.nih.gov/cgi-bin/signaturedb/signatureDB_DisplayGenes.cgi?signatureID=248">http://lymphochip.nih.gov/cgi-bin/signaturedb/signatureDB_DisplayGenes.cgi?signatureID=248</a> | Zeller KI et. al. Global mapping of c-Myc binding sites and target gene networks in human B cells. Proc Natl Acad Sci U S A. 2006 Nov 21;103(47):17834-9.                                                                               | Table 8. MYC targets in human B cells                                                                                     |
| BCL6 target genes                            | BCL6_target_ChIPseq                                      |                                                                                                                                                                                                     | Katerina Chatzi et al, unpublished data (Melnick lab)                                                                                                                                                                                   | BCL6 targets in DLBCL cells identified by ChIPseq                                                                         |
| CD123+ Dendritic cell overexpression genes   | Dendritic_cell_CD123pos_blood                            | <a href="http://lymphochip.nih.gov/cgi-bin/signaturedb/signatureDB_DisplayGenes.cgi?signatureID=175">http://lymphochip.nih.gov/cgi-bin/signaturedb/signatureDB_DisplayGenes.cgi?signatureID=175</a> | Lindstedt M et. al. Gene family clustering identifies functionally associated subsets of human in vivo blood and tonsillar dendritic cells. Lindstedt et al. J Immunol 175:4839 (2005)                                                  | Genes 3x higher in blood CD123+ DCs vs. blood BDCA1+ or BDCA3+ or CD16+ DCs (p<0.01) with signal > 7 in blood CD123+ DCs. |
| HRAS overexpression genes                    | HRAS_overexpression_2x_up                                | <a href="http://lymphochip.nih.gov/cgi-bin/signaturedb/signatureDB_DisplayGenes.cgi?signatureID=169">http://lymphochip.nih.gov/cgi-bin/signaturedb/signatureDB_DisplayGenes.cgi?signatureID=169</a> | Bild AH et. al. Oncogenic pathway signatures in human cancers as a guide to targeted therapies. Bild et al. Nature 439:353 (2006)                                                                                                       | Supplemental Table 1; Genes upregulated by H-ras by 2 fold                                                                |
| p53 upregulated genes                        | p53_up_Xray                                              | <a href="http://lymphochip.nih.gov/cgi-bin/signaturedb/signatureDB_DisplayGenes.cgi?signatureID=207">http://lymphochip.nih.gov/cgi-bin/signaturedb/signatureDB_DisplayGenes.cgi?signatureID=207</a> | Rosenwald A et. al. Fludarabine treatment of patients with chronic lymphocytic leukemia induces a p53-dependent gene expression response. Rosenwald et al. Blood. 104:1428 (2004)                                                       | p53 wt cells: at least 2 time points induced by > 1log2; p53 mutant cells: no time point induced >0.5log2                 |
| Memory T cell signature genes                | CD8_T_effectorDn_memoryIm_NaiveUp                        | <a href="http://lymphochip.nih.gov/cgi-bin/signaturedb/signatureDB_DisplayGenes.cgi?signatureID=151">http://lymphochip.nih.gov/cgi-bin/signaturedb/signatureDB_DisplayGenes.cgi?signatureID=151</a> | Holmes S et. al. Memory T cells have gene expression patterns intermediate between naive and effector. Proc Natl Acad Sci U S A. 2005 Apr 12;102(15):5519-23.                                                                           | Supplemental Table 2, EFFE (effector) down, MEM (memory) intermediary, NAI (naive) up                                     |
| IL-10 upregulated genes in ABC DLBCL         | IL10_OCILy3_Up                                           | <a href="http://lymphochip.nih.gov/cgi-bin/signaturedb/signatureDB_DisplayGenes.cgi?signatureID=253">http://lymphochip.nih.gov/cgi-bin/signaturedb/signatureDB_DisplayGenes.cgi?signatureID=253</a> | Lam LT et. al. Cooperative signaling through the signal transducer and activator of transcription 3 and nuclear factor-(kappa)B pathways in subtypes of diffuse large B-cell lymphoma. Blood. 2008 Apr 1;111(7):3701-13.                | Fig. 2B, IL-10 upregulated genes in ABC DLBCL cell line OCILy3                                                            |
| Cell cycle genes                             | Cell_cycle_Liu                                           | <a href="http://lymphochip.nih.gov/cgi-bin/signaturedb/signatureDB_DisplayGenes.cgi?signatureID=157">http://lymphochip.nih.gov/cgi-bin/signaturedb/signatureDB_DisplayGenes.cgi?signatureID=157</a> | Liu D et. al. A random-periods model for expression of cell-cycle genes. Proc Natl Acad Sci U S A. 2004 May 11;101(19):7240-5.                                                                                                          | Supporting Table 5, genes periodically expressed in the human cell cycle using a cancer cell line (HeLa)                  |
| Gene expression signatures in DLBCL          | Lymph_node_DLBCL                                         | <a href="http://lymphochip.nih.gov/cgi-bin/signaturedb/signatureDB_DisplayGenes.cgi?signatureID=8">http://lymphochip.nih.gov/cgi-bin/signaturedb/signatureDB_DisplayGenes.cgi?signatureID=8</a>     | Rosenwald A et. al. The use of molecular profiling to predict survival after chemotherapy for diffuse large-B-cell lymphoma. N Engl J Med. 2002 Jun 20;346(25):1937-47.                                                                 | Supplementary appendix 1, Gene-Expression Signatures Defined by Hierarchical Clustering in DLBCL                          |
| Blimp-1 repressed genes                      | Blimp_proliferation_repressed                            | <a href="http://lymphochip.nih.gov/cgi-bin/signaturedb/signatureDB_DisplayGenes.cgi?signatureID=88">http://lymphochip.nih.gov/cgi-bin/signaturedb/signatureDB_DisplayGenes.cgi?signatureID=88</a>   | Shaffer AL et. al. Blimp-1 orchestrates plasma cell differentiation by extinguishing the mature B cell gene expression program. Immunity. 2002 Jul;17(1):51-62.                                                                         | Blimp-1 repressed genes in human mature B cell                                                                            |
| Genes upregulated in resting monocyte        | Resting_monocyte_GNF                                     | <a href="http://lymphochip.nih.gov/cgi-bin/signaturedb/signatureDB_DisplayGenes.cgi?signatureID=41">http://lymphochip.nih.gov/cgi-bin/signaturedb/signatureDB_DisplayGenes.cgi?signatureID=41</a>   | Su AI et. al. A gene atlas of the mouse and human protein-encoding transcriptomes. Proc Natl Acad Sci U S A. 2004 Apr 20;101(16):6062-7.                                                                                                | 3x higher in CD14 monocytes v all other heme subsets (CD19, CD8, CD4, CD56, CD14, BDCA4, CD71, CD105)                     |
| Notch1 downregulated genes                   | Notch_T-ALL_down_Palomero                                | <a href="http://lymphochip.nih.gov/cgi-bin/signaturedb/signatureDB_DisplayGenes.cgi?signatureID=236">http://lymphochip.nih.gov/cgi-bin/signaturedb/signatureDB_DisplayGenes.cgi?signatureID=236</a> | Palomero T et. al. NOTCH1 directly regulates c-MYC and activates a feed-forward-loop transcriptional network promoting leukemic cell growth. Proc Natl Acad Sci U S A. 2006 Nov 28;103(48):18261-6.                                     | Supplemental Figure 10; genes upregulated by gamma secretase inhibitor and direct target of Notch1 ICN1 by CHIP-CHIP      |
| IL2, IL7 and IL15 induced genes              | Tcell_cytokine_induced_IL2_IL7_IL15only                  | <a href="http://lymphochip.nih.gov/cgi-bin/signaturedb/signatureDB_DisplayGenes.cgi?signatureID=72">http://lymphochip.nih.gov/cgi-bin/signaturedb/signatureDB_DisplayGenes.cgi?signatureID=72</a>   | target genes. Identification of dual-specificity phosphatase 5 (DUSP5) as a regulator of mitogen-activated protein kinase activity in interleukin-2 signaling. J Biol Chem. 2003 Feb 14;278(7):5205-13.                                 | Fig. 1C, IL2, IL7 and IL15 induced genes                                                                                  |
| SREBP1a and SREBP2 upregulated genes         | SREBP1a&2_up_Scap_dep                                    | <a href="http://lymphochip.nih.gov/cgi-bin/signaturedb/signatureDB_DisplayGenes.cgi?signatureID=185">http://lymphochip.nih.gov/cgi-bin/signaturedb/signatureDB_DisplayGenes.cgi?signatureID=185</a> | Horton JD et. al. Combined analysis of oligonucleotide microarray data from transgenic and knockout mice identifies direct SREBP target genes. Horton et al. PNAS 100:12027 (2003)                                                      | Table 1; Genes up in SREBP1a and SREBP2 Tg mice and down in Scap -/- mice.                                                |
| Co-expressed genes in human and mouse        | CNS_PNS_Node1663                                         | <a href="http://lymphochip.nih.gov/cgi-bin/signaturedb/signatureDB_DisplayGenes.cgi?signatureID=96">http://lymphochip.nih.gov/cgi-bin/signaturedb/signatureDB_DisplayGenes.cgi?signatureID=96</a>   | Su AI et. al. A gene atlas of the mouse and human protein-encoding transcriptomes. Proc Natl Acad Sci U S A. 2004 Apr 20;101(16):6062-7.                                                                                                | Cluster with correlation coefficient of 0.75 on GNF U133A data                                                            |
| Glutamine Glucose starve downregulated genes | Glutamine_Glucose_starve_both_down                       | <a href="http://lymphochip.nih.gov/cgi-bin/signaturedb/signatureDB_DisplayGenes.cgi?signatureID=137">http://lymphochip.nih.gov/cgi-bin/signaturedb/signatureDB_DisplayGenes.cgi?signatureID=137</a> | Peng T et. al. The immunosuppressant rapamycin mimics a starvation-like signal distinct from amino acid and glucose deprivation. Mol Cell Biol. 2002 Aug;22(15):5575-84.                                                                | List from Subramanian et al. PNAS 102:15545 (2005)                                                                        |
| IL4 induced genes                            | Tcell_cytokine_induced_IL4only                           | <a href="http://lymphochip.nih.gov/cgi-bin/signaturedb/signatureDB_DisplayGenes.cgi?signatureID=73">http://lymphochip.nih.gov/cgi-bin/signaturedb/signatureDB_DisplayGenes.cgi?signatureID=73</a>   | Kovanen PE et. al. Analysis of gamma c-family cytokine target genes. Identification of dual-specificity phosphatase 5 (DUSP5) as a regulator of mitogen-activated protein kinase activity in interleukin-2 signaling. J Biol Chem. 2003 | Fig. 1D, genes preferentially induced by IL-4                                                                             |

**Table S6:** Detailed genes enriched in the lymphoid gene sets and gene ontology terms shown in Table S5 (excel file)

**Table S7:** DNA methylation (A) and gene expression (B) signature of *BCR-ABL1*-positive B-ALL (excel file)**Table S8:** MassArray primers used to validate differential DNA methylation of genes in *BCR-ABL1*-positive and MLLr B-ALL. Forward primers were indicated by “\_F” and reverse primers by “\_R”.

| Target Promoter | sequence (5' → 3')                                         |
|-----------------|------------------------------------------------------------|
| ACSL1_MA1_F     | aggaagagagGGGATGGTTTTGTAGGGTTATTAG                         |
| ACSL1_MA1_R     | cagtaatcgactcactatagggagaaggctAACAACTCCTCTCCCTAAAAACC      |
| ACSL1_MA2_F     | aggaagagagGGTTTTTATGGGAGAGGAGTTGTT                         |
| ACSL1_MA2_R     | aggaagagagGTGGTTGAGGGAATTTTTTTTAGA                         |
| ACSL1_MA3_F     | cagtaatcgactcactatagggagaaggctCCACATACCAAACCCTTTAATTC      |
| ACSL1_MA3_R     | aggaagagagTTAGTTTTAAAGTTAGGGTGGTGGG                        |
| BCL6_MA1_F      | aggaagagagTTGTGTTTATTGTTAGTTGGGTTTTG                       |
| BCL6_MA1_R      | cagtaatcgactcactatagggagaaggctAAATTTTAAACAAAACCTCTCACCC    |
| CD200_MA1_F     | aggaagagagTTTGTAATTTTAGTATTTTGGGAGG                        |
| CD200_MA1_R     | cagtaatcgactcactatagggagaaggctTAAAAATTTCTTCCACTTACATT      |
| CD200_MA2_F     | aggaagagagTATTTTTGAAAAGGGAATAATGTTTGA                      |
| CD200_MA2_R     | cagtaatcgactcactatagggagaaggctAAACCACCCTTTAAAAACAAAATC     |
| CD38_MA1_F      | aggaagagagTGGGTGATTATTATGTGTTAGGTATTG                      |
| CD38_MA1_R      | cagtaatcgactcactatagggagaaggctAAAAAACAACCACCTTAATCCTCT     |
| CD38_MA2_F      | aggaagagagGTGGGTGGGTATTGTATAGGAGTT                         |
| CD38_MA2_R      | cagtaatcgactcactatagggagaaggctCCAAACAAAATTAACCTCTCCTAA     |
| CD38_MA3_F      | aggaagagagTTTTAGGAGAGTTTAATTTGTTTTGG                       |
| CD38_MA3_R      | cagtaatcgactcactatagggagaaggctAACTAACTCAAACACCTTACCCA      |
| CD38_MA4_F      | aggaagagagGTTTTTTGGGTAAGGTGTTTTGAGT                        |
| CD38_MA4_R      | cagtaatcgactcactatagggagaaggctTAATTTAACCTTCTACACCCTCT      |
| CNTNAP1_MA1_F   | aggaagagagTGATTTAGTTTTTATAGAGAAGATGGAGAA                   |
| CNTNAP1_MA1_R   | cagtaatcgactcactatagggagaaggctCCTAACCTCAACCAACAAAATAAA     |
| CNTNAP1_MA2_F   | aggaagagagGGGGTGTTAGTGGTTAGAGTTTTAGT                       |
| CNTNAP1_MA2_R   | cagtaatcgactcactatagggagaaggctAAAAACTACCTCTATACCTTACCACATT |
| FLT3_MA1_F      | cagtaatcgactcactatagggagaaggctTAAAAATATTTCCCACTCTCCAC      |
| FLT3_MA1_R      | cagtaatcgactcactatagggagaaggctTCCTACTTACTCACCTACCTACCCC    |
| FLT3_MA2_F      | cagtaatcgactcactatagggagaaggctCAAACCTCACAAACACCAACAAA      |
| FLT3_MA2_R      | aggaagagagTTTGTTTGGTGTGTTGTAGAGTTTGA                       |
| FLT3_MA3_F      | cagtaatcgactcactatagggagaaggctCTCTATACCCCAACTTCTCTTCTA     |
| FLT3_MA3_R      | aggaagagagAGGGTTATGTTTGGGTTGTAGGTAG                        |
| FLT3_MA4_F      | cagtaatcgactcactatagggagaaggctCCAACAACCCTTAAAAACAATAAA     |
| FLT3_MA4_R      | aggaagagagTTTATTGTTTTTAAAGGTTGTTGGA                        |
| FUT4_MA1_F      | cagtaatcgactcactatagggagaaggctAAAAAAATTTACACACACACACCA     |
| FUT4_MA1_R      | aggaagagagTATTTTTTTTGTGGTGTGTGTGTGT                        |
| FUT4_MA2_F      | cagtaatcgactcactatagggagaaggctAAAAAAACTCAAATAATATCCCAA     |
| FUT4_MA2_R      | aggaagagagTTTAATAAATTGGTGAAGGGTTTTT                        |
| GAB1_MA1_F      | aggaagagagAGGAGGGGATAGTTGAAGTTAGAAG                        |
| GAB1_MA1_R      | cagtaatcgactcactatagggagaaggctCAAACAACAATAACTAACAAAATTAACC |
| GAB1_MA2_F      | aggaagagagGGAAGAAATGATATTTTTGTGTTGAT                       |
| GAB1_MA2_R      | cagtaatcgactcactatagggagaaggctCCCTACCTTTCTCTTTAAAACAATAA   |

---

|                |                                                           |
|----------------|-----------------------------------------------------------|
| GAB1_MA3_F     | aggaagagagAGATTTGTTTGATTGATTGGATTGT                       |
| GAB1_MA3_R     | cagtaatacgactcactatagggagaaggctCAAATTCAAACATTTCTCTACCTC   |
| GIMAP5_MA1_F   | aggaagagagTAGAAGTAGAGTTTGTGAGAAGGGG                       |
| GIMAP5_MA1_R   | cagtaatacgactcactatagggagaaggctTAAAAACAAAACCTAAAAACCAA    |
| GIMAP5_MA2_F   | aggaagagagAATGGGATGGGGTATATTGTTTTAG                       |
| GIMAP5_MA2_R   | cagtaatacgactcactatagggagaaggctACCCTATCCTCCAAAATAACAATCA  |
| GIMAP5_MA3_F   | aggaagagagTGATTGTTATTTTGGAGGATAGGGT                       |
| GIMAP5_MA3_R   | cagtaatacgactcactatagggagaaggctCCTCTAAAACTTCAATTCTCCCAT   |
| GIMAP5_MA4_F   | aggaagagagGGGAGTAAGGTTGAATTGATTTTTT                       |
| GIMAP5_MA4_R   | cagtaatacgactcactatagggagaaggctCTACCCCAACCCATATATTTCCAA   |
| HLA-DQA1_MA1_F | aggaagagagGGGATTGTTAGGGAGGGAAATTA                         |
| HLA-DQA1_MA1_R | cagtaatacgactcactatagggagaaggctCTAAAACCTACAAACACCTACCACCA |
| HLA-DQA1_MA2_F | aggaagagagTGGTGGTAGGTGTTTGTAGTTTTAG                       |
| HLA-DQA1_MA2_R | cagtaatacgactcactatagggagaaggctAACCTACCAAATCAAATTTTAACC   |
| HLA-DQA1_MA3_F | aggaagagagTAAATAAAGTTTTTGTGTTGGGGG                        |
| HLA-DQA1_MA3_R | cagtaatacgactcactatagggagaaggctTAAAATAACCCCAAATCTACCACC   |
| IGF2BP2_MA1_F  | cagtaatacgactcactatagggagaaggctTAAAACTATTCCAACACCAACTCC   |
| IGF2BP2_MA1_R  | aggaagagagGGAGTTGGTGTGGAATAGTTTTTA                        |
| IGF2BP2_MA2_F  | cagtaatacgactcactatagggagaaggctTAAAATTAATTTCCCCCAAATTA    |
| IGF2BP2_MA2_R  | aggaagagagTTTTAATTTGATTTTAATTTGGGGG                       |
| IL2RA_MA1_F    | aggaagagagTGGAATTATTTATTTGGGGATTTTT                       |
| IL2RA_MA1_R    | cagtaatacgactcactatagggagaaggctCCAACCCAATACTTAAAAAAAACAA  |
| IL2RA_MA2_F    | aggaagagagGGGTTGTTATTTTTGTGGGTTTTATT                      |
| IL2RA_MA2_R    | cagtaatacgactcactatagggagaaggctAAAACCTTACTCCTTCATCCCAAAT  |
| ITGAE_MA1_F    | aggaagagagTATTGGGTTGGTAGGTAAGGAAAT                        |
| ITGAE_MA1_R    | aggaagagagGTTGTAGGTGGTTTTTTTAAGGATG                       |
| ITGAE_MA2_F    | cagtaatacgactcactatagggagaaggctTAATTTATAACTCCCTACAATCCCC  |
| ITGAE_MA2_R    | cagtaatacgactcactatagggagaaggctAAAACCTAACATCCAAAACCTTCCAA |
| ITGAE_MA3_F    | aggaagagagTTGGAAAGTTTTGGATGTTAGTTTT                       |
| ITGAE_MA3_R    | cagtaatacgactcactatagggagaaggctATACAAACATCTCTTCAAACCCCTA  |
| ITGAE_MA4_F    | aggaagagagGAGTAGAGTTTTGGAGATTGGTTGT                       |
| ITGAE_MA4_R    | cagtaatacgactcactatagggagaaggctAAACAAAATCTCACTCTATCACCCA  |
| ITGAE_MA5_F    | aggaagagagTTGTTTTAAAGGAAATTGATTGGTT                       |
| ITGAE_MA5_R    | cagtaatacgactcactatagggagaaggctCAATTCTCTACCTCAACCTCCTAAA  |
| ITGAE_MA6_F    | aggaagagagTTTAGGAGGTTGAGGTAGAGAATTG                       |
| ITGAE_MA6_R    | cagtaatacgactcactatagggagaaggctAAACAACCTTCTAATACTTCCCACC  |
| ITGAE_MA7_F    | aggaagagagTGTGTGTGAATATTTTTTGTTTTTG                       |
| ITGAE_MA7_R    | cagtaatacgactcactatagggagaaggctACTAATAACCCCTACAAAACCATCCC |
| LTB_MA1_F      | aggaagagagTTTAGTTTTTGTGGGTTTTGTGTTT                       |
| LTB_MA1_R      | cagtaatacgactcactatagggagaaggctAATCTTTTACCCCTCTAACTCAAC   |
| LTB_MA2_F      | aggaagagagGTTGAGTTAGAGGGGGTAAAAGATT                       |
| LTB_MA2_R      | cagtaatacgactcactatagggagaaggctCCTTTAATTCCACCCTAAAAACCTA  |
| LTB_MA3_F      | aggaagagagGATTTGTATATTTGGTTGGGATTTT                       |
| LTB_MA3_R      | cagtaatacgactcactatagggagaaggctCCTTCTCACTCAACACAAAAAACT   |
| LTB_MA4_F      | aggaagagagGGATGGAAATGGAGTTTTATTTTTT                       |
| LTB_MA4_R      | cagtaatacgactcactatagggagaaggctTAACTCACTACAACCTCTACCTCCC  |
| MAP1A_MA1_F    | cagtaatacgactcactatagggagaaggctAAACCAAATCTAAAAAAAATTCCC   |
| MAP1A_MA1_R    | cagtaatacgactcactatagggagaaggctAAAAATTAATACTCTTACCCAAAA   |
| MAP1A_MA2_F    | cagtaatacgactcactatagggagaaggctAAAATAAAAAACCCACTACAAACC   |
| MAP1A_MA2_R    | aggaagagagGGAATGTGTTTAATAGGAGGGTTTT                       |
| MAP1A_MA3_F    | aggaagagagGGGGTTTTTGAATAGAGGAGTTAGT                       |

---

---

|               |                                                             |
|---------------|-------------------------------------------------------------|
| MAP1A_MA3_R   | aggaagagagTTTGGTTGGAGTTGAGGGTATAGTA                         |
| MAP7_MA1_F    | cagtaatcgactcactatagggagaaggctTCAAATCCTATTCAATCAATTTCC      |
| MAP7_MA1_R    | aggaagagagGGAATTGATTGAATAGGATTTTGA                          |
| MAP7_MA2_F    | cagtaatcgactcactatagggagaaggctTAACTCTCCCAATACCCTTAAAC       |
| MAP7_MA2_R    | aggaagagagAAGGGTATTGGGGAGAGTTATAGTG                         |
| MRPL33_MA1_F  | aggaagagagTTTTTTTGTAAATGTAAGGTAAGGAAGG                      |
| MRPL33_MA1_R  | cagtaatcgactcactatagggagaaggctCCTATAATCCCAACCCTTTAAAAA      |
| MRPL33_MA2_F  | aggaagagagGTTTTAGTTTTTTAAAGGGTTGGGA                         |
| MRPL33_MA2_R  | cagtaatcgactcactatagggagaaggctCAAAACTCATACCTTTCCCAATAA      |
| MRPL33_MA3_F  | aggaagagagGGTTTTAATGTTTATTGGGAAAGGT                         |
| MRPL33_MA3_R  | cagtaatcgactcactatagggagaaggctCCCTAACTCCTATTTCTAAATCAA      |
| NOV_MA1_F     | aggaagagagTAAGAGTGGGGTTTAGGAATTTGTAT                        |
| NOV_MA1_R     | cagtaatcgactcactatagggagaaggctAATCACCTCAAACCCCTTCTAAATAA    |
| NOV_MA2_F     | aggaagagagTATTTAGAAGGGGTTTGAGGTGATT                         |
| NOV_MA2_R     | cagtaatcgactcactatagggagaaggctATCAAACCTCCAACCAAAAAA         |
| NOV_MA3_F     | aggaagagagTGTTTTAGGAGATGGAGAAGTAGGA                         |
| NOV_MA3_R     | cagtaatcgactcactatagggagaaggctCCACCCTCTAAAAAAACCAATC        |
| NOV_MA4_F     | aggaagagagGTTTTTTGGGAAGGGGAATATAAAA                         |
| NOV_MA4_R     | cagtaatcgactcactatagggagaaggctAAAATACCCCAAACTTTACCC         |
| PARP8_MA1_F   | cagtaatcgactcactatagggagaaggctCCCTCTATAAAATTTTCATTTCTAA     |
| PARP8_MA1_R   | aggaagagagGAAGATTTTAAGTTTTGGATTTTTGG                        |
| PARP8_MA2_F   | aggaagagagTTTTTTTGAGATGAAGTTTTTTTGTG                        |
| PARP8_MA2_R   | cagtaatcgactcactatagggagaaggctAATTAACAAAACCTAACCTCACCTA     |
| PCDHGA5_MA1_F | cagtaatcgactcactatagggagaaggctAAACATTACTCAACAAAACCTAACCC    |
| PCDHGA5_MA1_R | aggaagagagTGTGGTAAATGTTTTTTGTTGTATT                         |
| PCDHGA5_MA2_F | cagtaatcgactcactatagggagaaggctCAAACCTTTCCCAATAACTTAAACCT    |
| PCDHGA5_MA2_R | cagtaatcgactcactatagggagaaggctAAACAAAATCTTACTCTATCTCCCAAA   |
| PCDHGA5_MA3_F | aggaagagagTAGTTGAGAGATTTATAGTTGTGGGTG                       |
| PCDHGA5_MA3_R | cagtaatcgactcactatagggagaaggctTCATCCCTAAAAAATACAAAAAACTC    |
| PCDHGA5_MA4_F | aggaagagagTTATGAAGTTTAATGGTTATTTGAGGG                       |
| PCDHGA5_MA4_R | aggaagagagTTATTTGAGGAGAGAGGTAGTAGATGG                       |
| PRKCH_MA1_F   | cagtaatcgactcactatagggagaaggctCATTTTCTACACCCATAAAAATTATACA  |
| PRKCH_MA1_R   | aggaagagagGTTTGATTAATATGGAGAAATTTTGT                        |
| PRKCH_MA2_F   | cagtaatcgactcactatagggagaaggctCCCTCAAATAACCATTAACTTCATAAT   |
| PRKCH_MA2_R   | cagtaatcgactcactatagggagaaggctATTAATCCTATTTCCCTTAATCTCTACC  |
| PRKCH_MA3_F   | cagtaatcgactcactatagggagaaggctACAATACTCAACCAACTAAAATTAC     |
| PRKCH_MA3_R   | cagtaatcgactcactatagggagaaggctAAAATCTTAATACTACCTAAATCAACCAA |
| RBKS_MA1_F    | aggaagagagTTAGTTTTTTGTTGTTTGTGAGGG                          |
| RBKS_MA1_R    | cagtaatcgactcactatagggagaaggctTAAACACCATCCAAATCTTACAA       |
| RBKS_MA2_F    | aggaagagagATTGTAAGAAATTTGGATGGTGTTTT                        |
| RBKS_MA2_R    | cagtaatcgactcactatagggagaaggctAACTCCAAAATCAAAAATCACTTAAC    |
| S100A9_MA1_F  | aggaagagagGTGTTTTTATAGTGGGTAGGGAGGT                         |
| S100A9_MA1_R  | cagtaatcgactcactatagggagaaggctTCTCAAAAATAAACAACCCTCTTACA    |
| S100A9_MA2_F  | aggaagagagAAAAGGAAGGGGTAGATTGTTTATG                         |
| S100A9_MA2_R  | cagtaatcgactcactatagggagaaggctAAAACCTAACTCACTTACCAAAACC     |
| ZAP70_MA1_F   | aggaagagagGGTTTTTAGAGTTTTTGGGGTATTA                         |
| ZAP70_MA1_R   | cagtaatcgactcactatagggagaaggctAAACAACCTACCCTTACTCTCCAAT     |
| ZAP70_MA2_F   | aggaagagagGATGTTTGGTATAGAAGGGGTTTTT                         |
| ZAP70_MA2_R   | cagtaatcgactcactatagggagaaggctCCAACACTACCTACCAACTACAAA      |

---



**Table S9:** QPCR primers for gene expression signatures genes in *BCR-ABL1* and MLLr B-ALL and for the genes in the E2A-PBX1 and MLL-AF4 knockdown and BCL6 mRNA expression experiments.

| Genes            | Forward (5' → 3')         | Reverse (5' → 3')         |
|------------------|---------------------------|---------------------------|
| ACSL1            | TTCGTGTTTGACTTGTCCATTC    | GTCTGCAACATGAGGTGACTGT    |
| CD200            | AAAGCTGTAAGCCCAGAAAACA    | CTCCAGGGTGATATTCCAGAAG    |
| CD38             | ATCACCACACCAAACCTCTCTT    | ACATCATGCAACAAGGTCATTC    |
| CNTNAP1          | CTAAACCAATGCCCTTCTCATC    | GCAGAAAGGACCTATGTCAACC    |
| FLT3             | CCTTTCAGCAGAGAGATGGATT    | TGGAGGGATGAAGTCCTTAAAA    |
| FUT4             | ATTCACGTTTTTCTGGACCAAG    | CTGTGAGGAATCCAACAACAA     |
| GAB1             | CCCATGATGTTTTACCAAAGGT    | CCCAGATGGGGTATTA AAAACA   |
| GAPDH            | CGACCACTTTGTCAAGCTCA      | CCCTGTTGCTGTAGCCAAAT      |
| GIMAP5           | CATCAGGAAGGTGAAAGAGGTC    | CAGTTGTCCGTGTTTGCTACAT    |
| HLA-DQA1         | CAGAGCTCACAGAGACTGTGGT    | GTCTGGAAGCACCAACTGAAC     |
| HPRT             | TGTTGTAGGATATGCCCTTGA     | AGGCTTTGTATTTTGCTTTTCC    |
| IGF2BP2          | GAACAAGCTTTACATCGGGAAC    | GTAGTCCACGAAGGCGTAGC      |
| IL2RA            | AGTCATGAAGCCCAAGTGAAT     | TGTGACTTCAGAGCTTCCAAAA    |
| ITGAE            | CCAGCATCCTTTGCATTACTTT    | ACTTTTTGCACAATGCACAGAC    |
| LST1             | GGATCCAAGAGCTGACTATGC     | GTTTTTACTGGCTGGACCACAG    |
| LTB              | GAAGGAACAGGCGTTTCTGAC     | TAGCCGACGAGACAGTAGAGGT    |
| MAP1A            | GTGCCCTGTATATGTGGATCT     | CACTCGACGGAAGAAGTCAAG     |
| MAP7             | CGTCCAAGTCTCTTCTCATT      | CTTCTCAGGCTCCACTTTGACT    |
| MRPL33           | GATTCAGAAATCCTGTAGCGTGT   | ACAATGGCCTTCAAATCACAG     |
| NOV              | GGCAAATAGTCAAGAAGCCAGT    | TCCCTCTGGTAGTCTTCAGCTC    |
| PARP8            | CTGCAGCTGTTAAGTCAGAGGA    | GCTTCAAGTTTGTGTTGTGCTC    |
| PCDHGA5          | CGACTACCGCCAGAATGTCTAC    | CTTCTTGCCCGACTTCTTCTT     |
| PRKCH            | CTGCTGGACCCCTATCTGAC      | GTACGTGGGTTTGTGGTCTTC     |
| RBKS             | GCTGCATTAGTGCTCTTGA AAA   | GGTATCCACAGCCTTGACTTTC    |
| RHOH             | TGGACTTCAGAGTAGGACAGCA    | CTCGTACACTGTGGGCTTGTAG    |
| S100A9           | GAGCTTCGAGGAGTTCATCAT     | ATCTTGGCCACTGTGGTCTTA     |
| ZAP70            | TCTTCTACGGCAGCATCTCG      | AAAGTGGTGGAAAGCGCACAT     |
| MLL/AF4 (RS4;11) | TCAGCACTCTCTCCAATGGCAATAG | GGGGTTTGTTCACTGTCACTGTCC  |
| HOXA9*           | AAAACAATGCCGAGAATGAGAGCG  | TGGTGT TTTGTATAGGGGGACC   |
| BCL6             | TGAGAAGCCCTATCCCTGTG      | TGTGACGGAAATGCAGGTTA      |
| E2A              | ACGCAGCCCAAGAAGGTCCG      | CGGTGGCATCCCTGCCGTAG      |
| E2A-PBX1 (697)   | CCAGCCTCATGCACAACCA       | GGGCTCCTCGGATACTCAAAA     |
| CALD1            | GCTTGCTCTCGGCTGTGCTCC     | AGATGTCTGAGCCTTCTGGTTGGTC |
| ARL4C            | ACAGGGCAGGCCCTGTTGA       | CGCTGAACCGTCCCAGGCAG      |
| EXTL3            | CCAGGCCATCCGGGACATGGT     | GACAGGGCCTGAGGGCATCCT     |
| ST6GALNAC3       | TACGTGACCACAGAGAAGCGCA    | ACAGGCGTCCATGGCCAGAAG     |
| Cox6b            | AACTACAAGACCGCCCTTT       | GCAGCCAGTTCAGATCTTCC      |

\* HOXA9 Taqman FAM/TAMRA probe (5' → 3') CCCATCGATCCCAATAACCCAGC

**Table S10:** DNA methylation (A) and gene expression (B) signature of *E2A-PBX1* B-ALL (**excel file**)

**Table S11:** Antibodies used for QChIP and ChIP-seq.

| ChIP antibody         | Host   | Amount/IP | Catalog Number | Provider                           |
|-----------------------|--------|-----------|----------------|------------------------------------|
| <b>MLL/AF4:</b>       |        |           |                |                                    |
| MLL1 <sup>N</sup>     | Rabbit | 2ug       | A300-086A      | Bethyl Laboratories                |
| AF4 <sup>C</sup>      | Rabbit | 2ug       | ab31812        | Abcam                              |
| H3K79me2              | Rabbit | 2ug       | 04-835         | Millipore                          |
| H3                    | Rabbit | 2ug       | ab1791         | Abcam                              |
| <b>E2A-PBX1:</b>      |        |           |                |                                    |
| E2A <sup>N</sup> SDI  | Rabbit | 2 ug      | -              | Roeder Laboratory<br>(unpublished) |
| PBX1/2/3 <sup>C</sup> | Rabbit | 2 ug      | sc-888         | Santa Cruz                         |
| PBX1 <sup>N</sup>     | Rabbit | 2 ug      | sc-889         | Santa Cruz                         |
| P300                  | Rabbit | 2 ug      | sc-585         | Santa Cruz                         |

**Table S12:** Primers used for QChIP.

| Target promoter   | Forward primer (5' → 3') | Reverse primer (5' → 3')  |
|-------------------|--------------------------|---------------------------|
| <b>MLL/AF4:</b>   |                          |                           |
| Control           | GGCTCCTGTAACCAACCACTACC  | CCTCTGGGCTGGCTTCATTC      |
| HOXA7             | AGCCGACTTCTTGCTCCTTTGC   | CCCGTAGCCGCTTCTCTGTGAG    |
| HOXA10            | CGCAACCACCCCAGCCAG       | TTGTCCGCCGAGTCGTAGAGG     |
| MEIS1             | TGACAACCTCGCCTGTGATTGAC  | CGCCCCTCAGACCCAACTACC     |
| CTGF              | CAACTCGCATCCCTGACGCTC    | AGCACCATCTTTGGCTGGAGAAG   |
| IGF2BP2/IMP-2     | TTCGTGGACTACCCGACCAG     | GCGTGGAAGTGAGCGTGCG       |
| C20orf103         | CCTGATGTTGTTCCGTGAGTAGCG | CCCGTCCTCTCTCCAGTCG       |
| FLT3              | GCCTCGGTCCCTGCCTCTG      | CCCAGCCCTGCGATGCC         |
| FUT4              | AGACCGTGCCAACACTACGAGCG  | GAAGGAGGTGATGTGGACAGCG    |
| RUNX2             | TGCTTCATTCGCCTCACAAACAAC | CCAGAGACTTCTTGCTGTCTCCTG  |
| IGFBP7            | CAGCGACGGCACCACCTACC     | CAGGGTTGGAGAGGGAAGCG      |
| ITGAE             | CTGCGGCGGGAACCACTG       | TGAACCTCTTGGCGGGTGC       |
| VAT1L             | CGCTTAGGGCACGGCTCTTG     | TTGAATGTGGGATGCTCGGC      |
| BCL6              | GGAAATCCTTACGGCTTGGCAG   | GGGCTGAGGGTCTCCATCATAGG   |
| HOXA9*            | GGTGCGCTCTCCTTCGC        | GCATAGTCAGTCAGGGACAAAGTGT |
| <b>E2A-PBX1 :</b> |                          |                           |
| Control           | 5-TGCCTTAACTCCACAAGTTTGA | 5-ACAGAGGCTCAAAGGAAAACAA  |
| CALD1             | AAGCAGCGTGAGGTGAAATGAAGC | ACACACACACACACACACACAC    |
| ARL4C             | CCCTGGAGGCCAGCCTTTCTTG   | TGCGGACGAAATGAGGTAGCCC    |
| EXTL3             | ACAAGTGAGGCCCCCAACTGTGA  | GCTTGGGTCGTGTGCCACCC      |
| ST6GALNAC3        | GTTAGGCCCTCTCCCTGGGTG    | TGAGGCCTGGTTACATGCTGCC    |

\* HOXA9 Taqman FAM/TAMRA probe (5' → 3') TACCCTCCAGCCGGCCTTATGCC

**Table S13:** DNA methylation (A) and gene expression (B) signature of MLLr B-ALL (**excel file**)

**Table S14:** Summary of number of reads and peaks detected in each ChIP-seq experiment

| ChIP-seq experiment**         | Uniquely aligned reads* (Mbases) | Number of peaks detected | ChIPseeqer parameters |
|-------------------------------|----------------------------------|--------------------------|-----------------------|
| <b>MLL<sup>N</sup> RS4;11</b> | 686                              | 3,312                    | -t 15 -f 2 -fraglen   |
| INPUT MLL <sup>N</sup> RS4;11 | 947                              |                          |                       |
| <b>H3K79me2 RS4;11</b>        | 911                              | 28,476                   | -t 15 -f 2 -fraglen   |
| INPUT H3K79me2 RS4;11         | 951                              |                          |                       |
| <b>AF4<sup>C</sup> RS4;11</b> | 5,585                            | 6,253                    | -t 15 -f 2 -fraglen   |
| INPUT AF4 <sup>C</sup> RS4;11 | 4,391                            |                          |                       |
| <b>E2A<sup>N</sup> 697</b>    | 815                              | 3,358                    | -t 15 -f 2 -fraglen   |
| <b>PBX1<sup>C</sup> 697</b>   | 1,022                            | 19,108                   | -t 15 -f 2 -fraglen   |
| <b>p300</b>                   | 1,109                            | 15,501                   | -t 15 -f 2 -fraglen   |
| INPUT 697                     | 874                              |                          |                       |

\*Aligned to hg18 using ELAND allowing up to 2 mismatches

\*\* AF4<sup>C</sup> and INPUT AF4<sup>C</sup> were done with HiSeq2000, and the others with GAI, Illumina

**Table S15:** Genomic regions enriched in MLL<sup>N</sup> (A), AF4<sup>C</sup> (B), H3K79me2 (C) and common in the three ChIP-seq (D) in RS4;11 cells (**excel file**)

**SUPPLEMENTARY FIGURES**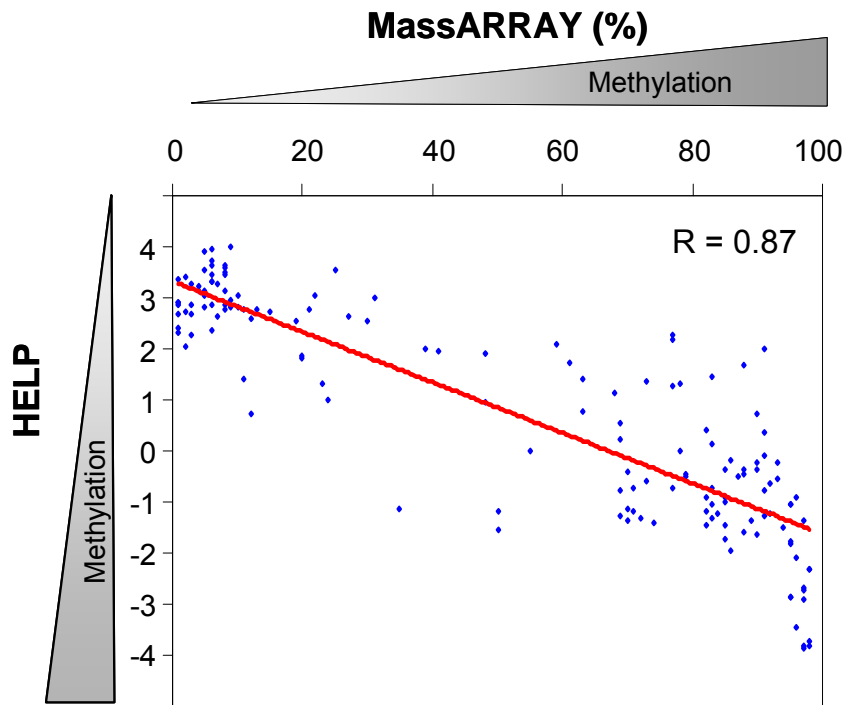

**Figure S1:** Technical validation of HELP arrays using MassArray EpiTyper. Correlation between HELP log ratio (y-axis) and percent methylation as measured by MassArray EpiTyper (x-axis), performed for 15 randomly selected probesets on 10 randomly selected E2993 primary B-ALL cases. Pearson correlation coefficient: -0.87, p-value < 1e-6. Methylation difference of 1 (dx>1) on HELP array corresponds to 20%, and dx>1.5 corresponds to 30%, methylation difference by MassArray (Equation for the trendline:  $y = -4.9484x + 3.3232$ ).

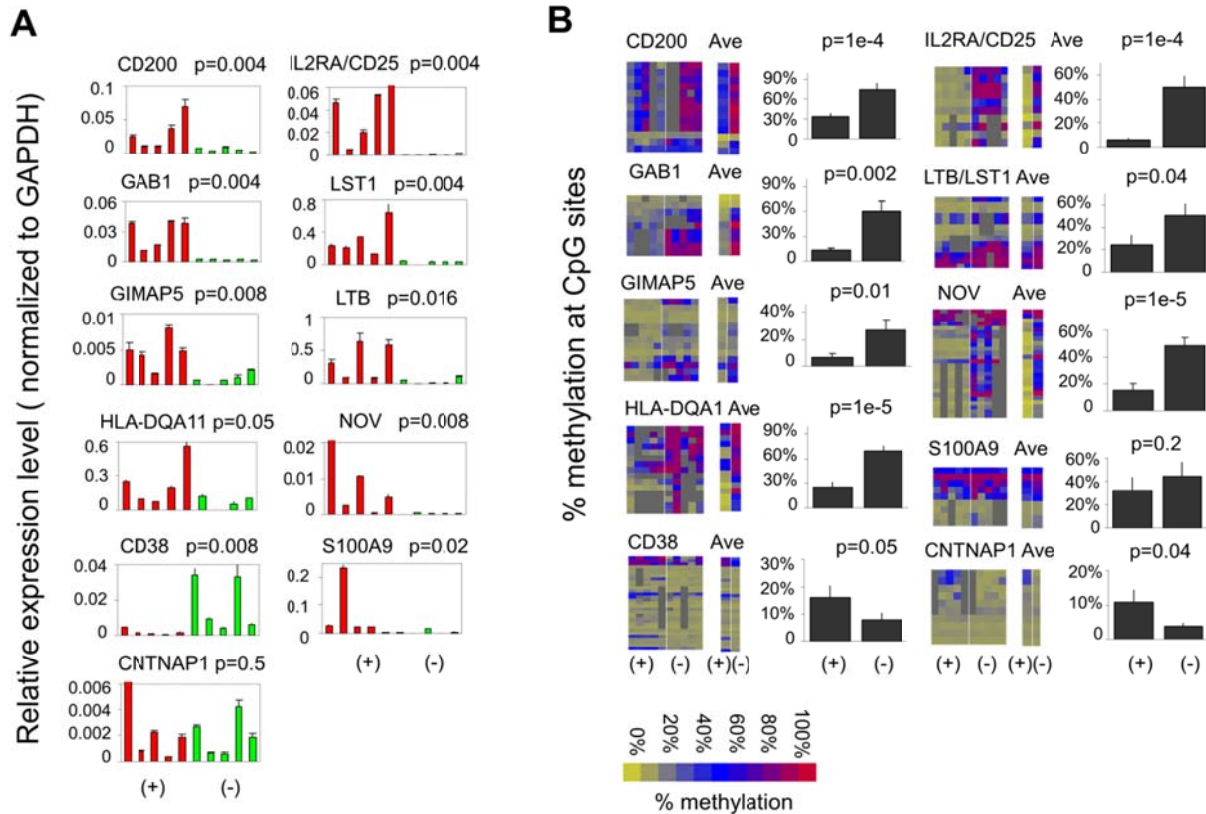

**Figure S2:** QPCR and MassArray EpiTyper validation of core signature genes in *BCR-ABL1*-positive B-ALL. **(a)** QPCR validation of 11 *BCR-ABL1* core signature genes, performed in five randomly selected *BCR-ABL1*-positive (in red) and five *BCR-ABL1*-negative (in green) primary B-ALL cases. Transcript abundance was calculated by normalizing to the control gene GAPDH (Y axis). Error bars represent s.e.m. P values were derived by one-tailed t-test. **(b)** Heatmap representation of MassArray results for each of the 11 core signature genes performed in five *BCR-ABL1*-positive and five *BCR-ABL1*-negative B-ALL cases. Rows represent individual CpGs and columns represent individual cases. The color key represents percent methylation. The summarized heatmaps in the middle show the average methylation levels for each CpG in *BCR-ABL1*-positive and -negative patients respectively. The bar graphs show the average methylation level of all CpGs with error bars representing the s.e.m for all the CpG sites. P values were derived by one-tailed t-test.

|             | CD25 (+) (>0%) | CD25 (-) (=0%) |
|-------------|----------------|----------------|
| BCR/ABL (+) | 69             | 44             |
| BCR/ABL (-) | 18             | 334            |

Fisher's Exact test  $p < 1e-6$

**Figure S3:** *IL2RA*(CD25) expression is associated with *BCR-ABL1*-positive B-ALL. 465 B-ALL patients enrolled in the E2993 clinical trial were studied (Imatinib-treated cases were excluded from the survival analysis). CD25 expression was measured by flow cytometry. Among the 113 *BCR-ABL1*-positive B-ALL patients, 69 (61.1%) samples are CD25 positive (CD25 expression > 0% by flow cytometry); while in the 352 *BCR-ABL1*-negative B-ALL, only 18 (5.1%) samples are CD25 positive.  $p < 1e-6$  by Fisher's exact test.

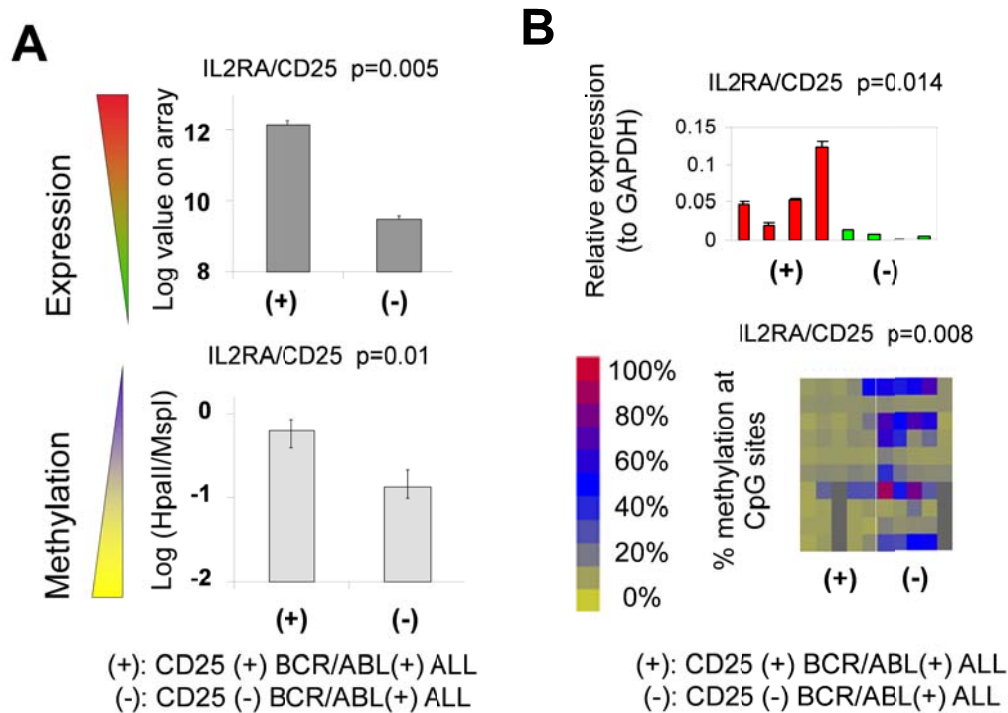

**Figure S4:** Differential expression and methylation of *IL2RA* in CD25+ vs. CD25- *BCR-ABL1*-positive B-ALL. **(a)** Average expression and methylation levels of *IL2RA* from the array data for the CD25-positive (CD25% >0%, n=77), and CD25-negative (CD25% =0%, n=6), *BCR-ABL1*-positive B-ALL samples. Error bars represent s.e.m. P values were shown above each panel by one-tailed t-test. **(b)** Top panel: *IL2RA* QPCR performed in four randomly selected CD25-positive (in red) and four CD25-negative (in green) *BCR-ABL1*-positive B-ALL primary cases. Transcript abundance was calculated by normalizing to GAPDH. Error bars represent s.e.m. from PCR triplicates. Bottom: *IL2RA* MassArray performed in five randomly selected CD25-positive and five CD25-negative *BCR-ABL1*-positive B-ALL primary cases. Each row represents an individual CpGs whereas columns represent individual cases. The color key represents % methylation. P values were calculated by one-tailed t-test for the average methylation value for all CpG sites in the positive and negative groups.

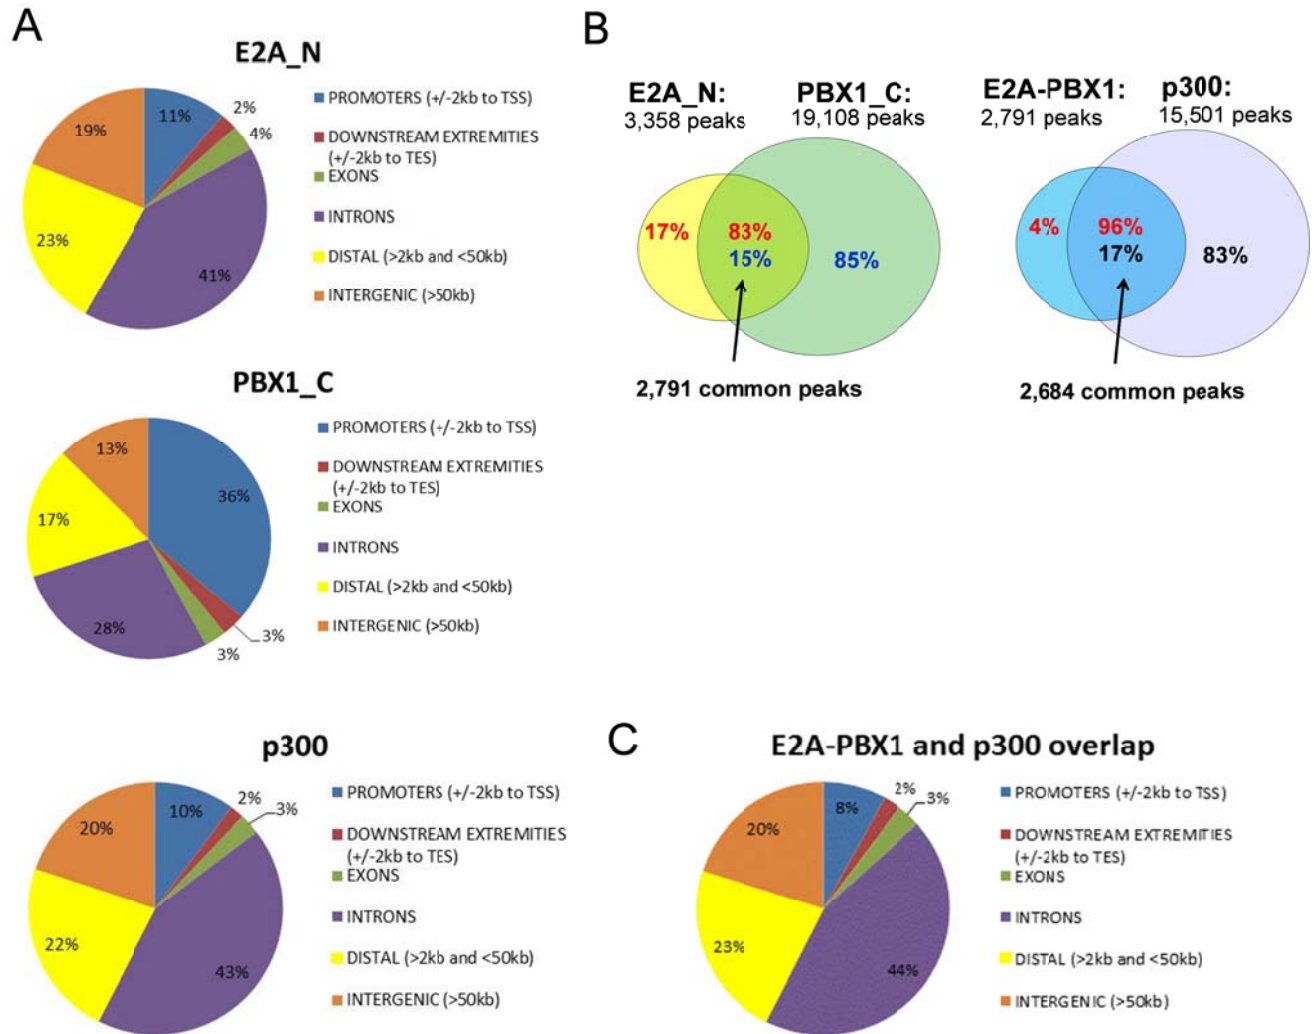

**Figure S5:** Whole-genome-wide binding patterns of E2A, PBX1 and p300. **(A)** E2A, PBX1 and p300 peaks were annotated to genomic regions including promoters (+/-2kb to TSS), downstream extremities (+/-2kb to TES), exons, introns, distal regions (between 2kb to 50 kb to TSS) and intergenic regions (>50kb to TSS). **(B)** Venn diagrams of overlap of peaks by E2AN and PBX1C, and the E2A-PBX1 and p300. **(C)** Annotation of genomic regions for the common peaks by E2A-PBX1 and p300.



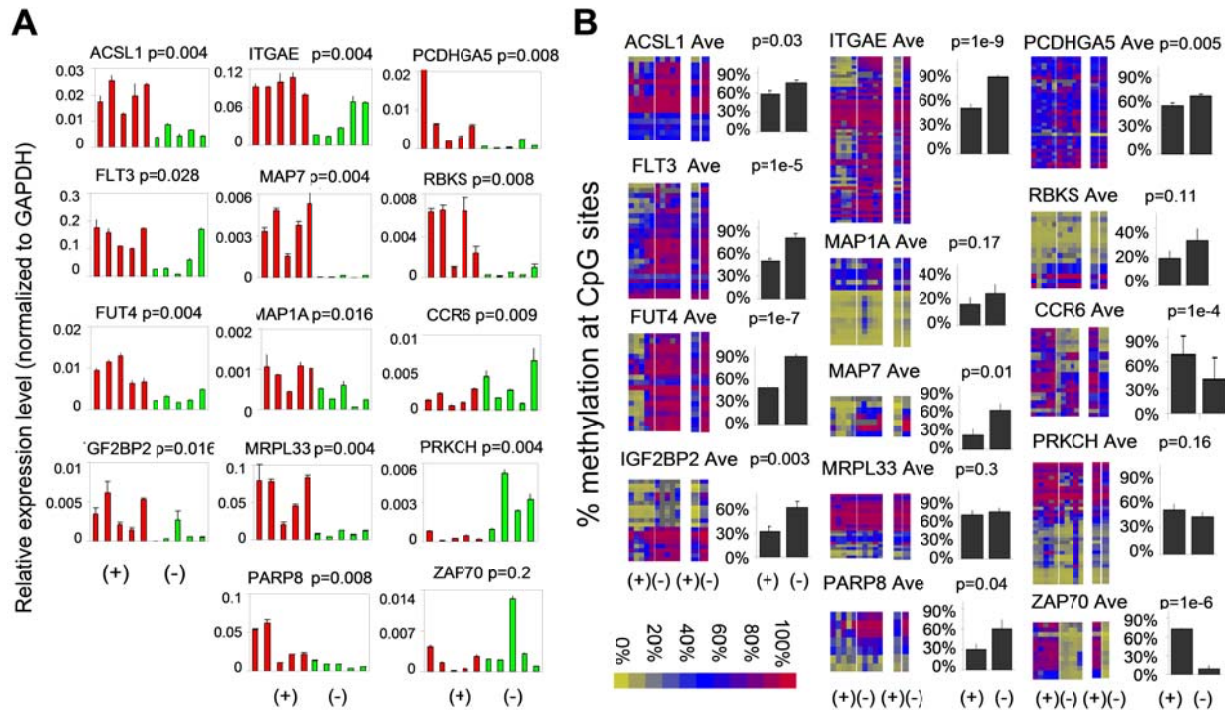

**Figure S6:** Validation of core MLLr signature genes. (a) QPCR was performed for fourteen core signature genes in five MLLr-positive (in red) and five MLLr-negative (in green) B-ALLs. Transcript abundance was calculated by normalizing to GAPDH. Error bars represent s.e.m. from PCR triplicates. P values were derived by one-tailed t-test. (b) Heatmap representation of MassArray performed in five MLLr-positive and five MLLr-negative B-ALLs. Rows represent individual CpGs whereas columns represent individual cases. The color key indicates percent methylation. Panels in the middle show the averaged methylation levels for each CpG in the MLLr and non-MLLr groups. Bar graphs show average methylation level of all CpGs with error bars indicating s.e.m. for all the CpG sites. P values were derived by one-tailed t-test.

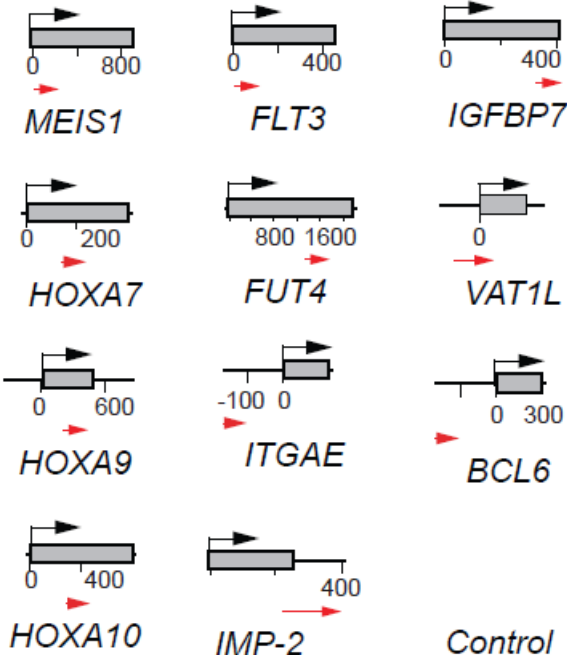

**Figure S7:** Primer locations for MLL<sup>N</sup>, AF4<sup>C</sup>, H3K79me2 and H3 QChIP in RS4;11 and CCRF-CEM cells. Red arrows show the primer locations and black arrow show the transcriptional start sites of the genes.

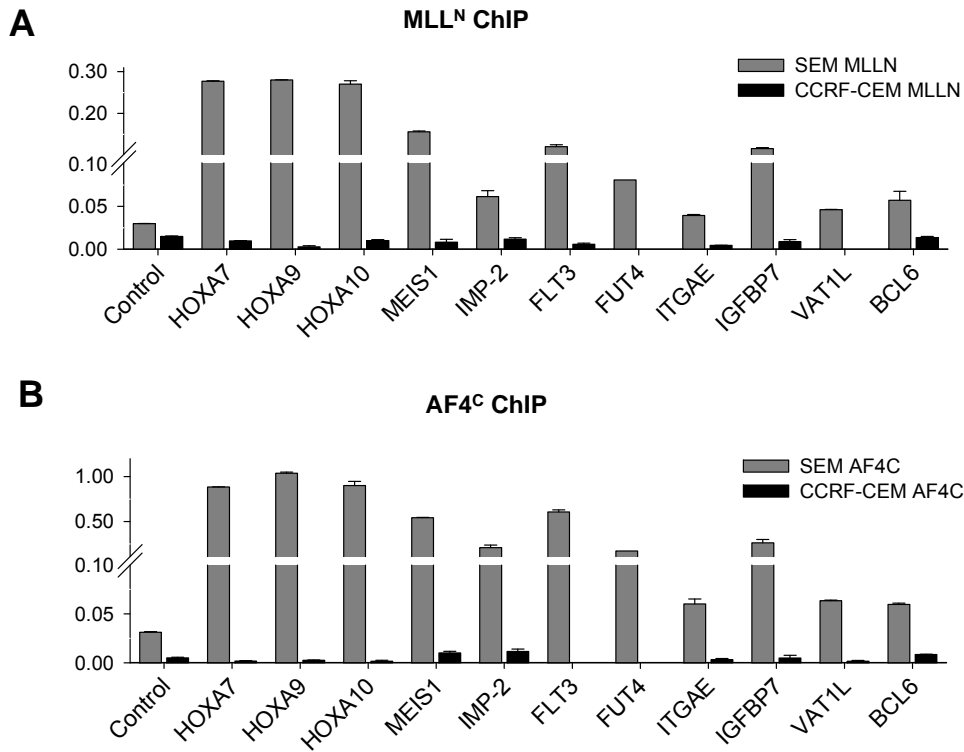

**Figure S8:** QChIP validation for the MLL/AF4 fusion binding in SEM cells. Each panel shows QChIP results for the four positive control, ten MLLr signature genes and one negative control, using MLL<sup>N</sup> (a) and AF4<sup>C</sup> (b) in SEM and CCRF-CEM cells. ChIP signal was calculated as a % of input and error bars represent s.e.m. from three independent ChIP experiments.

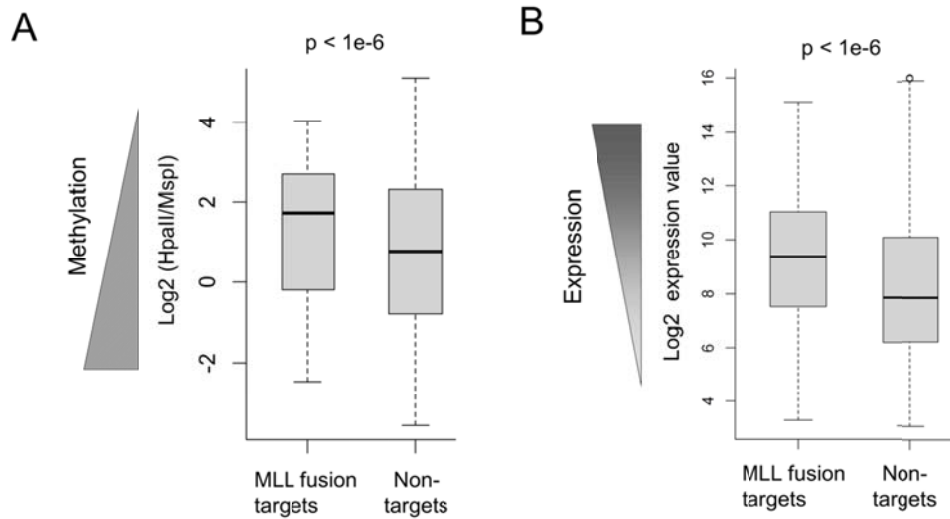

**Figure S9:** MLL-fusion target genes are more hypomethylated and expressed than the non-target genes in MLLr B-ALL. Box plot of methylation levels (a) and expression levels (b) of MLL-fusion target genes (n=603, identified by the overlap of MLL<sup>N</sup>, AF4<sup>C</sup> and H3K79me2 ChIP-seq) vs. the rest non-target genes in the MLLr B-ALL from the array data. P values were calculated by one-tailed Wilcoxon test.

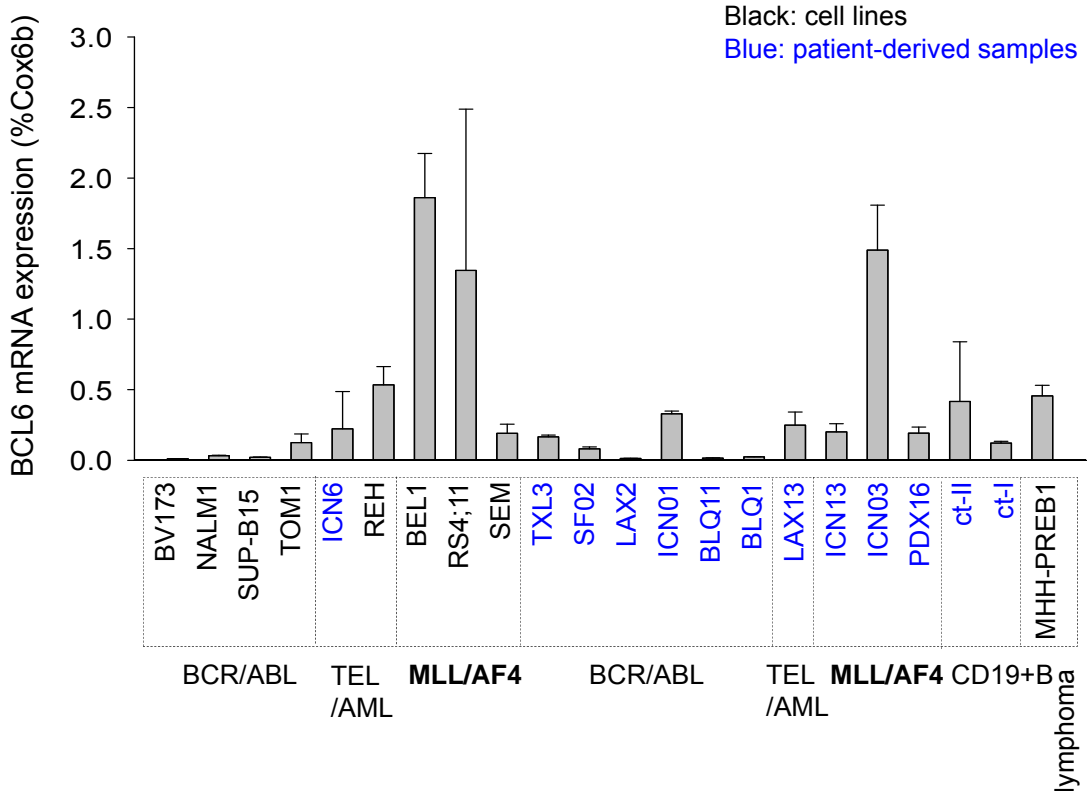

**Figure S10:** *BCL6* mRNA expression in MLLr B-ALL cell lines and primary samples. Figure 6D showed *BCL6* western blots performed in B-ALL cell lines (in black labels) and primary specimens. This figure showed the mRNA expression of *BCL6* in B-ALL cell lines (in black labels) and patient samples (in blue labels). One *BCL6* expressing lymphoma cell line MHH-PREB1 was used as control.

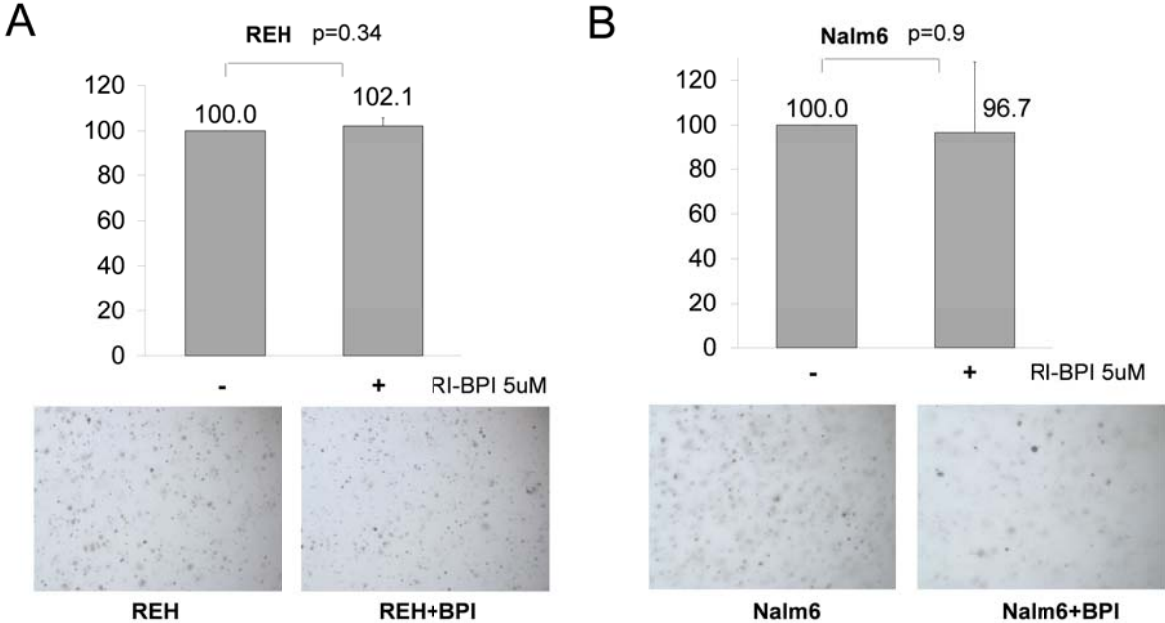

**Figure S11:** Colony formation assay in two non-MLLr B-ALL cell lines, REH (A) and Nalm6 (B). REH (AML/TEL) and Nalm6 cells and were exposed to 5  $\mu$ M RI-BPI, or vehicle for 48 hrs, followed by colony formation assay. Y axis shows percent colony formation of RI-BPI treated cells vs. vehicle. Data represent means  $\pm$  s.e.m. (n=3). Student's t-test was used to calculate p-values.

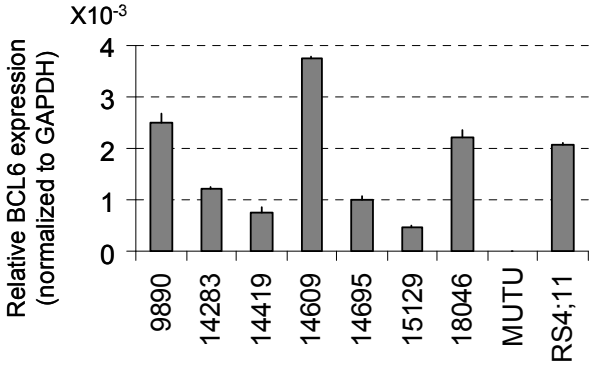

**Figure S12:** *BCL6* mRNA expression in MLLr B-ALL primary samples. QPCR was performed to measure *BCL6* transcripts in the seven MLLr B-ALL samples treated in figure 7D. The MLL-AF4 cell line RS4;11 is shown as a positive control and the MUTU B-cell line which is known to not express *BCL6* is the negative control. Transcript abundance was calculated by normalizing to GAPDH. Error bar represent the s.e.m. of PCR triplicates.

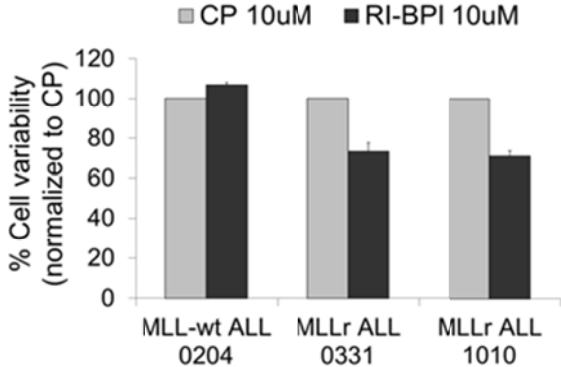

**Figure S13:** Effect of RI-BPI on viability of MLLr and non-MLLr B-ALL specimens. Three B-ALL specimens were obtained, two of which were MLLr and one was MLL wild type. These specimens were exposed to the indicated dose of RI-BPI or CP (control peptide). Viability was assessed by annexin V/7AAD flow cytometry and the percent viability of RI-BPI treated cells vs. CP was represented on the Y axis. Experiments were performed in triplicates and error bars represent s.e.m.



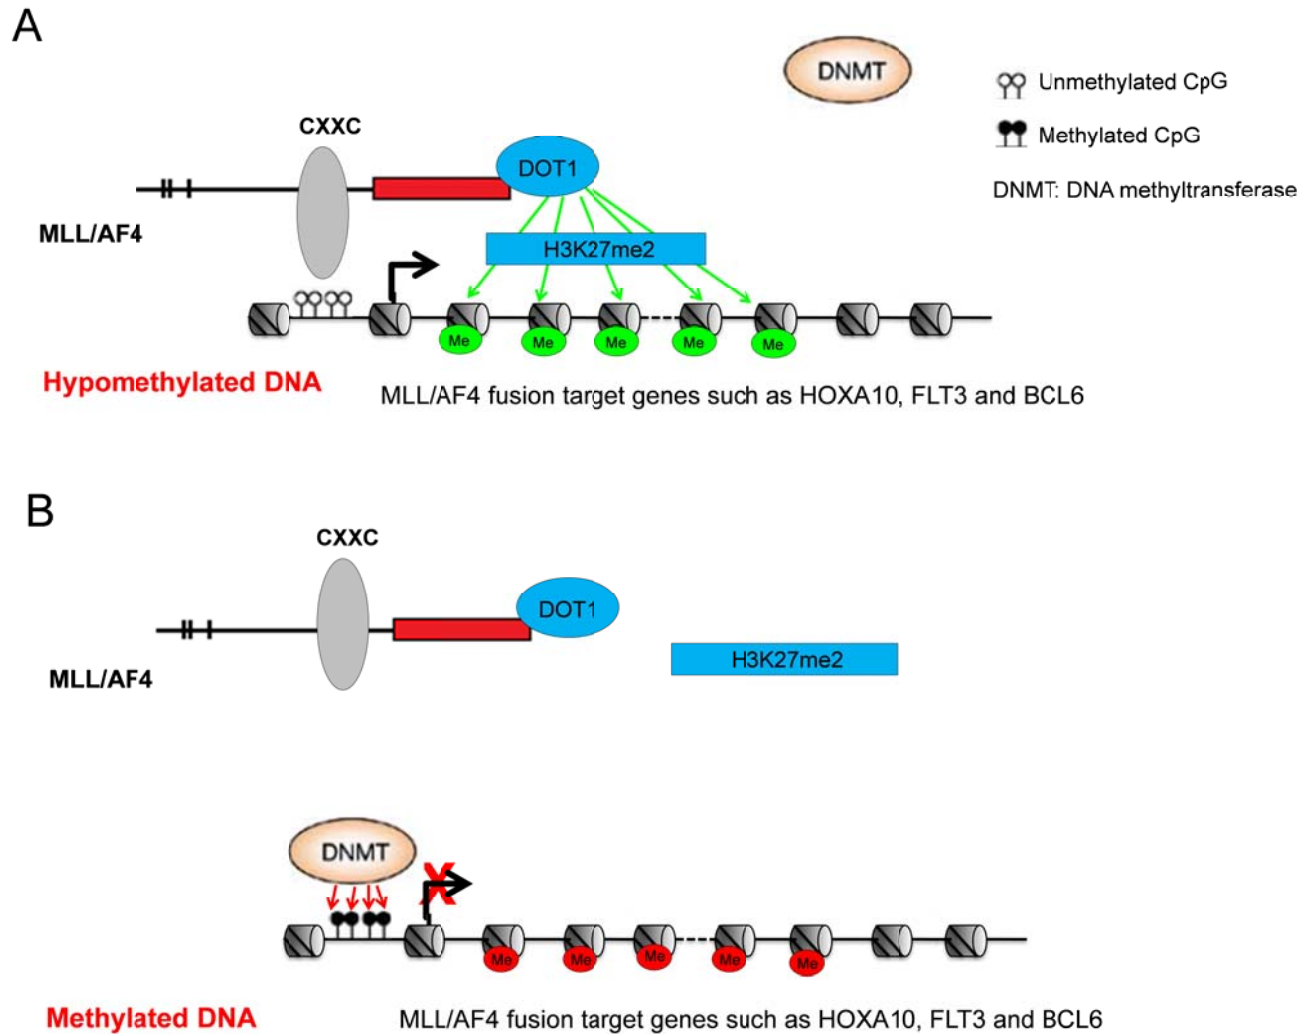

**Figure S14:** Scenario - DNA hypomethylation signatures in MLL/AF4 ALL are linked with MLL fusion oncoprotein binding and H3K79me2, which induce overexpression of these genes. **(A) (i)**, CXXC domain in the MLL/AF4 fusion protein bind to unmethylated DNA (Cierpicki et al. Nat Struct Mol Biol 2010(6)); **(ii)**, MLL-AF4 recruit DOT1, a H3K79 methyltransferase, which methylated H3K79 (Krivtsov et al, Cancer Cell 2008(7)); **(iii)**, H3K79 methylation is associated with transcription activation (reviewed in Shilatifard A., Annu. Rev. BioChem. 2006(8)). **(B) (i)**, CXXC domain in the MLL/AF4 fusion protein cannot bind to methylated DNA in a gene promoter; therefore **(ii)**, the factors such as DOT1 recruited by MLL/AF4 fusion proteins cannot activate the transcription of the genes through H3K79 methylation **(iii)**.

**Reference**

1. Rowe JM, Buck G, Burnett AK, Chopra R, Wiernik PH, Richards SM, *et al.* Induction therapy for adults with acute lymphoblastic leukemia: results of more than 1500 patients from the international ALL trial: MRC UKALL XII/ECOG E2993. *Blood* 2005;106(12):3760-7.
2. Ehrich M, Nelson MR, Stanssens P, Zabeau M, Liloglou T, Xinarianos G, *et al.* Quantitative high-throughput analysis of DNA methylation patterns by base-specific cleavage and mass spectrometry. *Proc Natl Acad Sci U S A* 2005;102(44):15785-90.
3. Giannopoulou EG, Elemento O. An integrated ChIP-seq analysis platform with customizable workflows. *BMC Bioinformatics* 2011;12:277.
4. Schafer E, Irizarry R, Negi S, McIntyre E, Small D, Figueroa ME, *et al.* Promoter hypermethylation in MLL-r infant acute lymphoblastic leukemia: biology and therapeutic targeting. *Blood* 2010;115(23):4798-809.
5. Benjamini Y, Hochberg Y. Controlling the false discovery rate: a practical and powerful approach to multiple testing. *Journal of the Royal Statistical Society, Series B (Methodological)* 1995;57 (1):289–300.
6. Cierpicki T, Risner LE, Grembecka J, Lukasik SM, Popovic R, Omonkowska M, *et al.* Structure of the MLL CXXC domain-DNA complex and its functional role in MLL-AF9 leukemia. *Nat Struct Mol Biol* 2010;17(1):62-8.
7. Krivtsov AV, Feng Z, Lemieux ME, Faber J, Vempati S, Sinha AU, *et al.* H3K79 methylation profiles define murine and human MLL-AF4 leukemias. *Cancer Cell* 2008;14(5):355-68.
8. Shilatifard A. Chromatin modifications by methylation and ubiquitination: implications in the regulation of gene expression. *Annu Rev Biochem* 2006;75:243-69.
